# Supplementary material for: Lutidine derivatives for live-cell imaging of the mitochondria and endoplasmic reticulum
Source: Royal Society of Chemistry journal article supplement (doi:10.1039/d2ob00995a), 2022-01-01
Supplement: d2ob00995a1.pdf [file d2ob00995a1.pdf]

## Lutidine Derivatives for Live-Cell Imaging of Mitochondria and Endoplasmic Reticulum

Deepmala Singh<sup>a</sup>, Dipeshwari J. Shewale<sup>b</sup>, Aakash Sengupta<sup>a</sup>, Virupakshi Soppina<sup>b\*</sup> & Sriram Kanvah<sup>a\*</sup>

<sup>a</sup>Department of Chemistry, Indian Institute of Technology Gandhinagar, 382055

<sup>b</sup>Department of Biological Engineering, Indian Institute of Technology Gandhinagar, 382055

[vsoppina@iitgn.ac.in](mailto:vsoppina@iitgn.ac.in), [vsoppina@gmail.com](mailto:vsoppina@gmail.com), [sriram@iitgn.ac.in](mailto:sriram@iitgn.ac.in)

### Supporting information

|           |                                                                                                         |
|-----------|---------------------------------------------------------------------------------------------------------|
| Fig S1    | Molecules bearing aryl fluoro moieties known in literature for targeting ER.                            |
| Table S1  | Previous studies done on ER using poly fluorinated compounds                                            |
| Scheme S1 | Synthetic schemes for the synthesis of the compounds                                                    |
| Fig S2    | The absorption Spectra for <b>1,2,3,4</b> and <b>7</b> in three different solvents                      |
| Fig S3    | The emission spectra for <b>1,2,3,4</b> and <b>7</b> in three different solvents                        |
| Fig S4    | UV-Absorption and fluorescence spectra of 0% glycerol and 100% glycerol (water-glycerol mixture).       |
| Table S2  | Absorption maxima, emission maxima and quantum yield for <b>1-7</b> in dioxane, acetonitrile and water. |
| Fig S5:   | <b>Confocal images of 4</b> showing localization in both mitochondria and ER.                           |
| Fig S6    | CCCP treatment experiment with <b>4</b> .                                                               |
| Fig S7    | Bar graph a-f representing MTT assay data for <b>2-7</b> respectively                                   |
| Fig S8:   | Viscosity detection in COS-7 cells treated with Tunicamycin                                             |
| Fig S9:   | <sup>1</sup> H, <sup>13</sup> C and HRMS spectra for <b>1</b> .                                         |
| Fig S10:  | <sup>1</sup> H, <sup>13</sup> C and HRMS spectra for <b>2</b> .                                         |
| Fig S11:  | <sup>1</sup> H, <sup>13</sup> C and HRMS spectra for <b>3</b> .                                         |
| Fig S12   | : <sup>1</sup> H, <sup>13</sup> C and HRMS spectra for <b>4</b> .                                       |
| Fig S13:  | <sup>1</sup> H, <sup>13</sup> C and HRMS spectra for <b>5</b> .                                         |
| Fig S14:  | <sup>1</sup> H and <sup>19</sup> F spectra for 2,6-dimethyl-1-((perfluorophenyl)methyl) pyridin-1-ium   |
| Fig S15:  | <sup>1</sup> H, <sup>13</sup> C and <sup>19</sup> F NMR spectra for <b>6</b>                            |
| Fig S16:  | <sup>1</sup> H, <sup>13</sup> C and <sup>19</sup> F NMR spectra for <b>7</b> .                          |

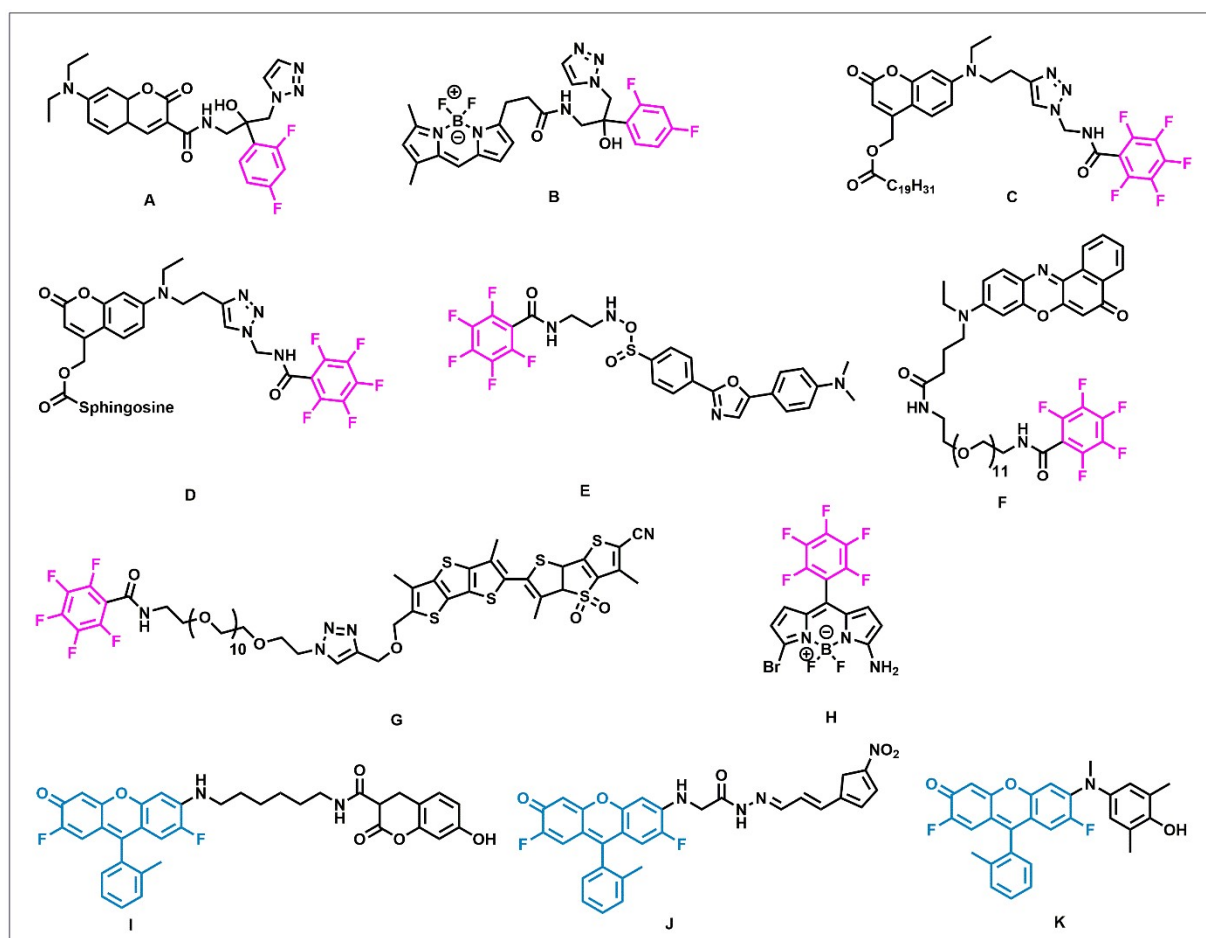

Fig S1. Molecules bearing aryl fluoro moieties known in literature for targeting ER.

Table- S1 Previous studies done on ER using poly fluorinated compounds

| SNo. | Probe | ER Imaging (type of cells)    | Other Biological Investigations if any | reference<br>s |
|------|-------|-------------------------------|----------------------------------------|----------------|
| 1    | A-B   | Fungal cells                  | Live fungal cell imaging               | 1              |
| 2    | C-D   | Live cells (HeLa cells)       | Live cell imaging                      | 2              |
| 3    | E     | Live cells and fixed cells    | Live cell imaging (Commercial dye)     | 3              |
| 4    | F     | Live cells (KB cells)         | Lipid order study                      | 4              |
| 5    | G     | Live cells (Hela Kyoto cells) | Membrane tension                       | 5              |
| 6    | H     | Live cells (HeLa cells)       | Live cell imaging                      | 3              |
| 7    | I     | Live cells (HeLa cells)       | ·OH detection                          | 6              |
| 8    | J     | Live cells (HeLa cells)       | Small molecule delivery                | 7              |
| 9    | K     | Live cells (RAW 264.7 cells)  | NO <sub>3</sub> <sup>-</sup> detection | 8              |

## Scheme 1: Synthetic schemes and procedures

### Synthesis:

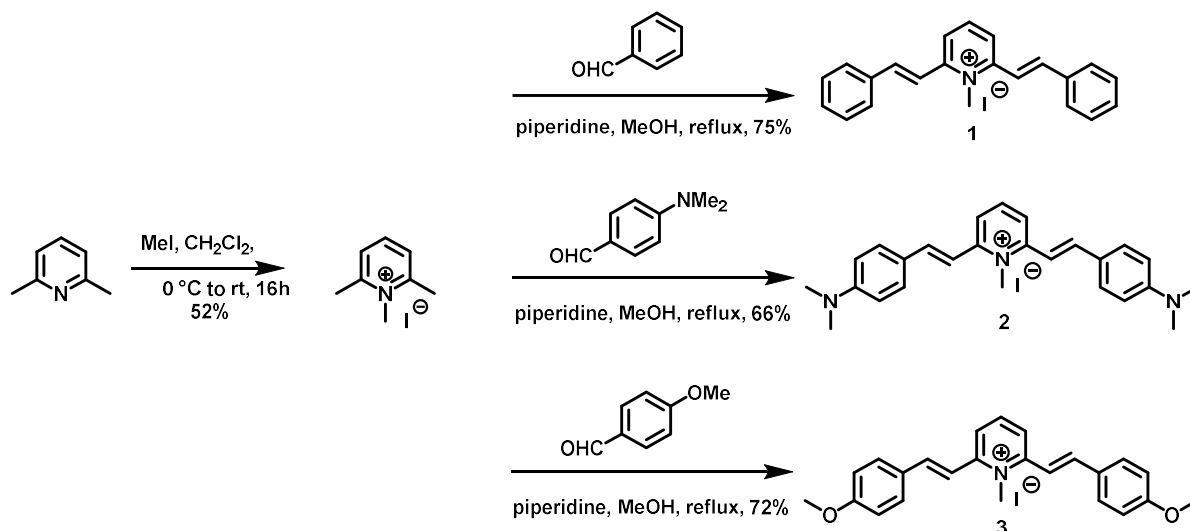

**Synthesis of 1-3:** To 2,6-lutidine (1 equiv) dissolved in dichloromethane, methyl iodide (1 equiv) was added and stirred at room temperature for around 18h. A white colored solid precipitate formed is filtered and washed with hexanes. The obtained solid was dissolved in methanol, piperidine was added and the 2.5 equivalents of the desired aldehydes: benzaldehyde, 4-dimethylaminobenzaldehyde, 4-methoxybenzaldehyde to obtain **1,2** and **3** respectively. The precipitate obtained was filtered out and washed with cold diethyl ether and hexane.

#### **<sup>1</sup>H and <sup>13</sup>C for 1**

**<sup>1</sup>H NMR** (500MHz, DMSO-D<sub>6</sub>) δ 8.47 (t, *J* = 8.1 Hz, 1H), 8.31 (d, *J* = 8.1 Hz, 2H), 7.88 (d, *J* = 8.8 Hz, 4H), 7.78 (d, *J* = 15.7 Hz, 2H), 7.71 (d, *J* = 15.7 Hz, 2H), 7.51 (m, 6H), 4.33 (s, 3H). **<sup>13</sup>C NMR** (126 MHz, DMSO-D<sub>6</sub>) δ 153.78, 143.70, 142.86, 135.50, 130.94, 129.47, 128.96, 124.56, 119.70, 42.33. **HRMS (ESI) (m/z):** [M]<sup>+</sup> calculated 298.1590, obtained 298.1548.

#### **<sup>1</sup>H and <sup>13</sup>C for 2**

**<sup>1</sup>H NMR** (500 MHz, DMSO-D<sub>6</sub>) δ 8.21 (t, *J* = 8.0 Hz, 1H), 8.09 (d, *J* = 8.1 Hz, 2H), 7.73 – 7.69 (m, 4H), 7.70 (dd, *J* = 12.2, 7.9 Hz, 6H), 7.32 (d, *J* = 15.7 Hz, 2H), 6.79 (d, *J* = 8.9 Hz, 4H), 4.20 (s, 3H), 3.03 (s, 12H). **<sup>13</sup>C NMR** (126 MHz, DMSO-D<sub>6</sub>) δ 154.12, 152.27, 143.27, 141.87, 130.79, 123.08, 121.62, 113.31, 112.25, 41.43, 40.59. **HRMS (ESI) (m/z):** [M]<sup>+</sup> calculated 384.2434, obtained 384.2409.

### <sup>1</sup>H and <sup>13</sup>C for 3

<sup>1</sup>H NMR (500 MHz, DMSO-D<sub>6</sub>) δ 8.38 (t, *J* = 8.0 Hz, 1H), 8.22 (d, *J* = 8.1 Hz, 2H), 7.84 (d, *J* = 8.9 Hz, 4H), 7.74 (dd, *J* = 15.7 Hz, 2H), 7.53 (d, *J* = 15.7 Hz, 2H), 7.07 (d, *J* = 8.9 Hz, 4H), 4.27 (s, 3H), 3.84 (s, 6H). <sup>13</sup>C NMR (126 MHz, DMSO-D<sub>6</sub>) δ 161.69, 153.97, 143.07, 142.58, 130.82, 128.25, 123.43, 117.01, 114.96, 55.93, 41.97. HRMS (ESI) (*m/z*): [M]<sup>+</sup> calculated 358.1802, obtained 358.1768.

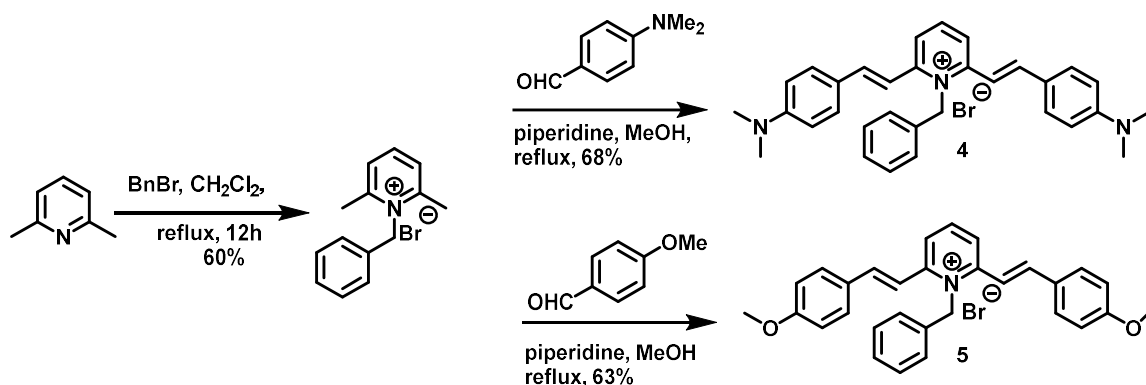

**Synthesis of 4 and 5:** 2,6-lutidine (1 equiv) was dissolved in Dichloromethane and added benzylbromide (1 equiv) and refluxed for around 12h. The pale white coloured precipitate formed, was filtered and washed with hexane. The solid obtained was dissolved in methanol, piperidine was added to it, followed by the addition of 2.5 equivalents of 4-dimethylaminobenzaldehyde and 4-methoxybenzaldehyde to obtain 4 and 5 respectively. Product was purified by column chromatography by dichloromethane: methanol (90:10).

### <sup>1</sup>H and <sup>13</sup>C for 4

<sup>1</sup>H NMR (500 MHz, DMSO) δ 8.32(m, 1H), 8.21 (d, *J* = 8.1 Hz, 2H), 7.75 (d, *J* = 15.5 Hz, 2H), 7.55 (d, *J* = 8.9 Hz, 4H), 7.40 (t, *J* = 7.6 Hz, 2H), 7.32 (t, *J* = 7.4 Hz, 1H), 7.24 (d, 2H), 7.22 (d, *J* = 15.3 Hz, 2H), 6.74 (d, *J* = 8.9 Hz, 4H), 6.15 (s, 2H), 3.00 (s, 12H). <sup>13</sup>C NMR (126 MHz, DMSO) δ 154.11, 152.29, 143.81, 142.48, 135.29, 130.94, 129.65, 128.70 – 128.25, 126.31, 122.92, 121.90, 112.62, 112.11, 40.59. HRMS (ESI) (*m/z*): [M]<sup>+</sup> calculated 460.2747, obtained 460.2734.

### <sup>1</sup>H and <sup>13</sup>C for 5

<sup>1</sup>H NMR (500 MHz, DMSO) δ 8.49 (t, *J* = 8.1 Hz, 1H), 8.36 (d, *J* = 8.1 Hz, 2H), 7.80 (d, *J* = 15.7 Hz, 2H), 7.72 (d, *J* = 8.8 Hz, 4H), 7.49 (d, *J* = 15.7 Hz, 2H), 7.37 (t, *J* = 7.5 Hz, 2H), 7.29 (t, *J* = 7.4 Hz, 1H), 7.23 (d, *J* = 7.5 Hz, 2H), 7.03 (d, *J* = 8.8 Hz, 4H), 6.27 (s, 2H), 3.81 (s, 6H). <sup>13</sup>C NMR (500 MHz, DMSO) δ 161.76, 154.05, 143.91, 143.33, 135.11, 130.76, 129.60, 128.63, 128.12, 126.69, 124.09, 116.55, 114.97, 55.91, 49.06. ESI mass profile: HRMS (ESI) (*m/z*): [M]<sup>+</sup> calculated 434.2115, obtained 434.2101.

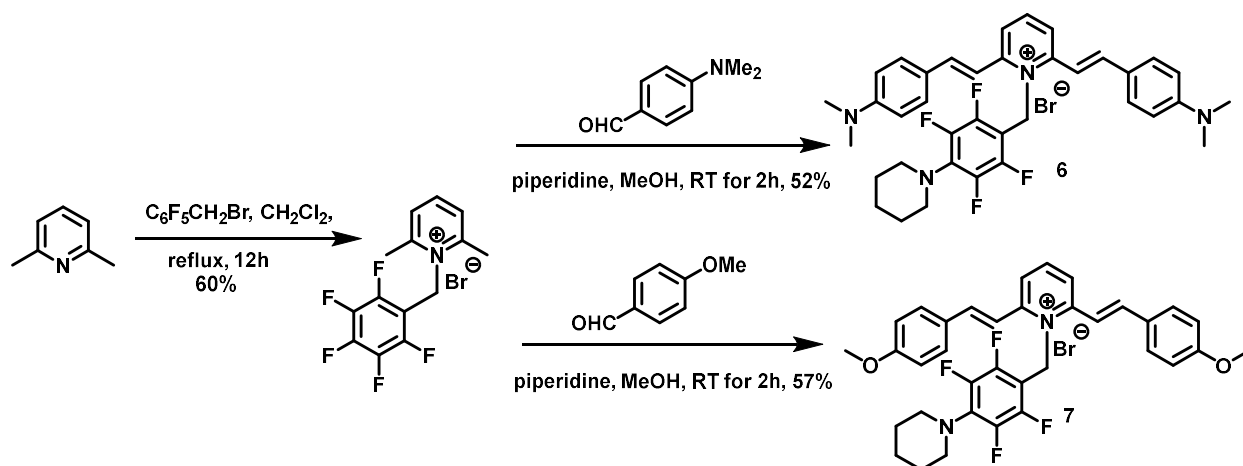

**Synthesis of 6 & 7:** 2,6-lutidine (1equiv) dissolved in dichloromethane and refluxed for 16h after the addition of pentafluoro benzylbromide (1.5 equiv). The pale white precipitate formed was filtered and washed with hexane. This precipitate is then dissolved in methanol, followed by the addition of the piperidine and 2.5 equivalents of 4-dimethylaminobenzaldehyde and 4-methoxybenzaldehyde to obtain **6** and **7** respectively. The desired product was purified by column chromatography by Dichloromethane: methanol (90:10).

#### $^1H$ , $^{13}C$ and $^{19}F$ for **6**

$^1H$  NMR (500 MHz,  $CDCl_3$ )  $\delta$  8.19 (t,  $J = 8.1$  Hz, 1H), 7.82 (d,  $J = 8.1$  Hz, 2H), 7.57 (d,  $J = 8.9$  Hz, 4H), 7.34 (d,  $J = 15.5$  Hz, 2H), 7.23 (d,  $J = 15.5$  Hz, 2H), 6.67 (d,  $J = 8.9$  Hz, 4H), 6.15 (s, 2H), 3.05 (s, 4H), 3.02 (s, 12H), 1.70 (s, 6H).  $^{13}C$  NMR (126 MHz, DMSO)  $\delta$  154.62 (s), 152.38 (s), 143.96 (s), 143.26, 142.05, 130.69 (s), 122.79 (s), 122.46 (s), 112.74 (s), 112.50, 112.74, 51.99 (s), 26.21 (s), 23.82 (s).  $^{19}F$  NMR (470 MHz,  $CDCl_3$ )  $\delta$  -143.37(d,2F), -150.82(d, 2F). ESI mass profile: HRMS (ESI) (m/z): [M]<sup>+</sup> calculated 615.3105, obtained 615.3119.

#### $^1H$ , $^{13}C$ and $^{19}F$ for **7**

$^1H$  NMR (500 MHz,  $CDCl_3$ )  $\delta$  8.24 (t,  $J = 8.0$  Hz, 1H), 7.94 (d,  $J = 8.0$  Hz, 2H), 7.65 (d,  $J = 8.7$  Hz, 3H), 7.50 (d,  $J = 15.8$  Hz, 2H), 7.37 (d,  $J = 15.7$  Hz, 2H), 6.93 (d,  $J = 8.6$  Hz, 4H), 6.28 (s, 2H), 6.28 (s, 2H), 3.83 (s, 6H), 3.04 (s, 4H), 1.54 (s, 7H).  $^{13}C$  NMR (126 MHz,  $CDCl_3$ )  $\delta$  160.84 (s), 153.79 (s), 142.94 (s), 141.81 (s), 129.39 (s), 126.17 (s), 123.32 (s), 115.39 (s), 113.66 (s), 54.38 (s), 50.72 (s), 25.15 (s), 22.75 (s).  $^{19}F$  NMR (470 MHz,  $CDCl_3$ )  $\delta$  -143.32(d,2F), -150.72(d,2F). HRMS (ESI) (m/z): [M]<sup>+</sup> calculated 589.2473, obtained 589.2477, difference 0.0004

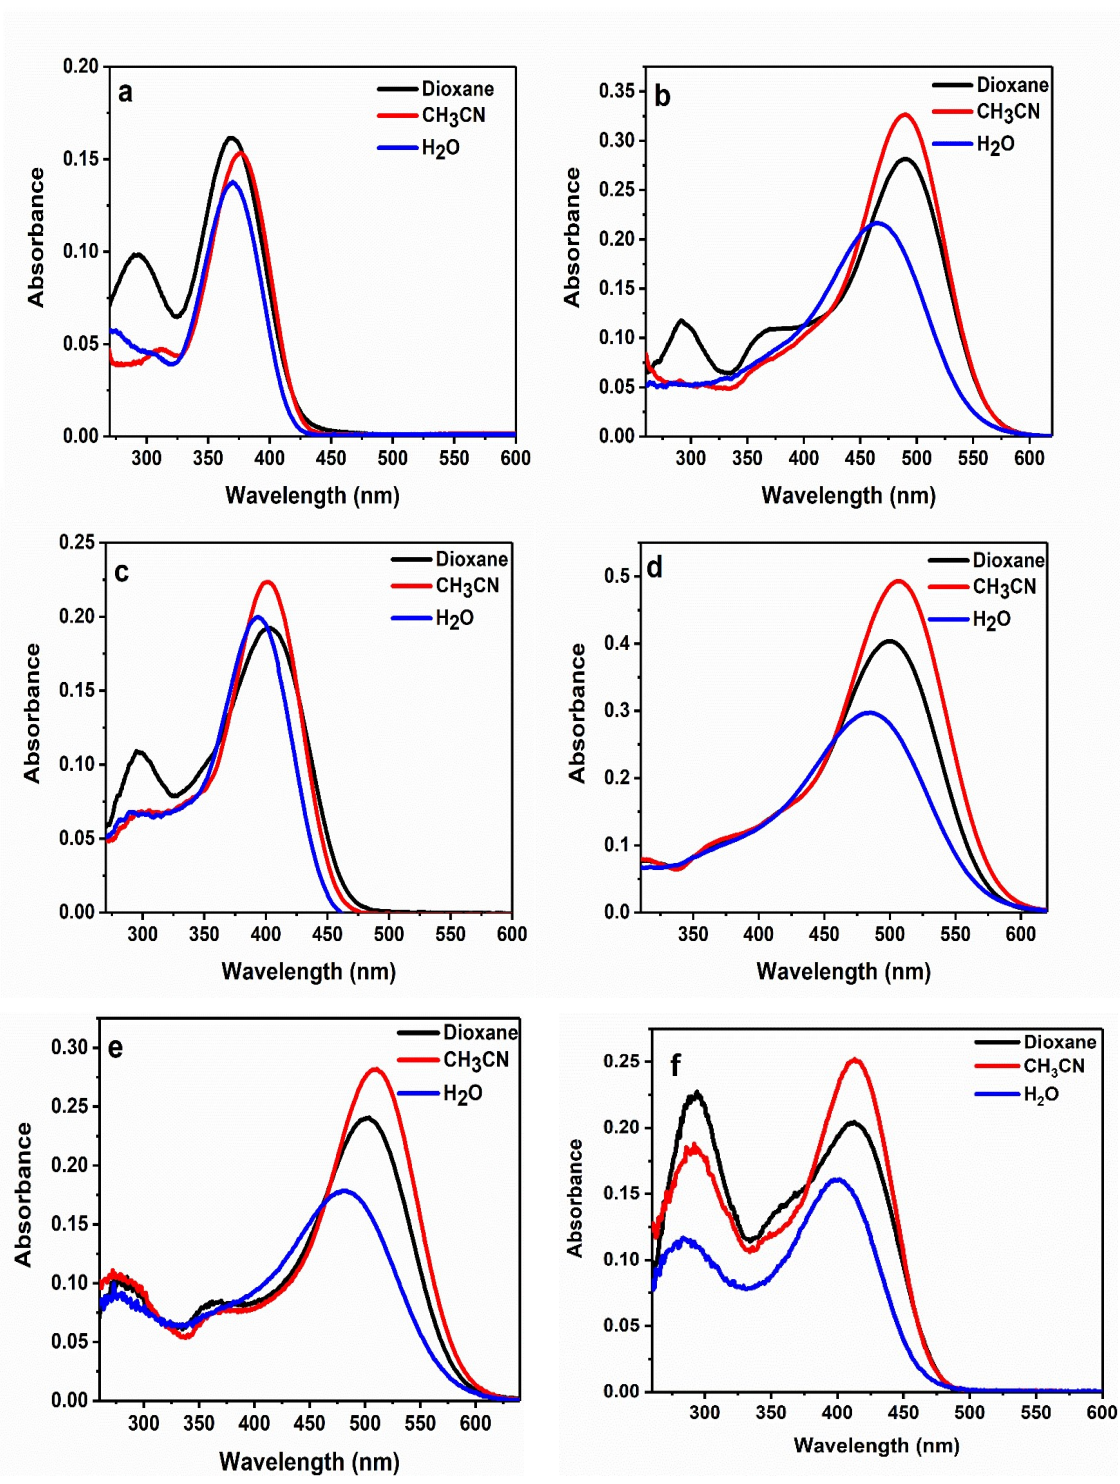

Fig S2: The spectra a-f represents the absorption spectra for molecules 1-4,6 and 7 respectively in different solvents.

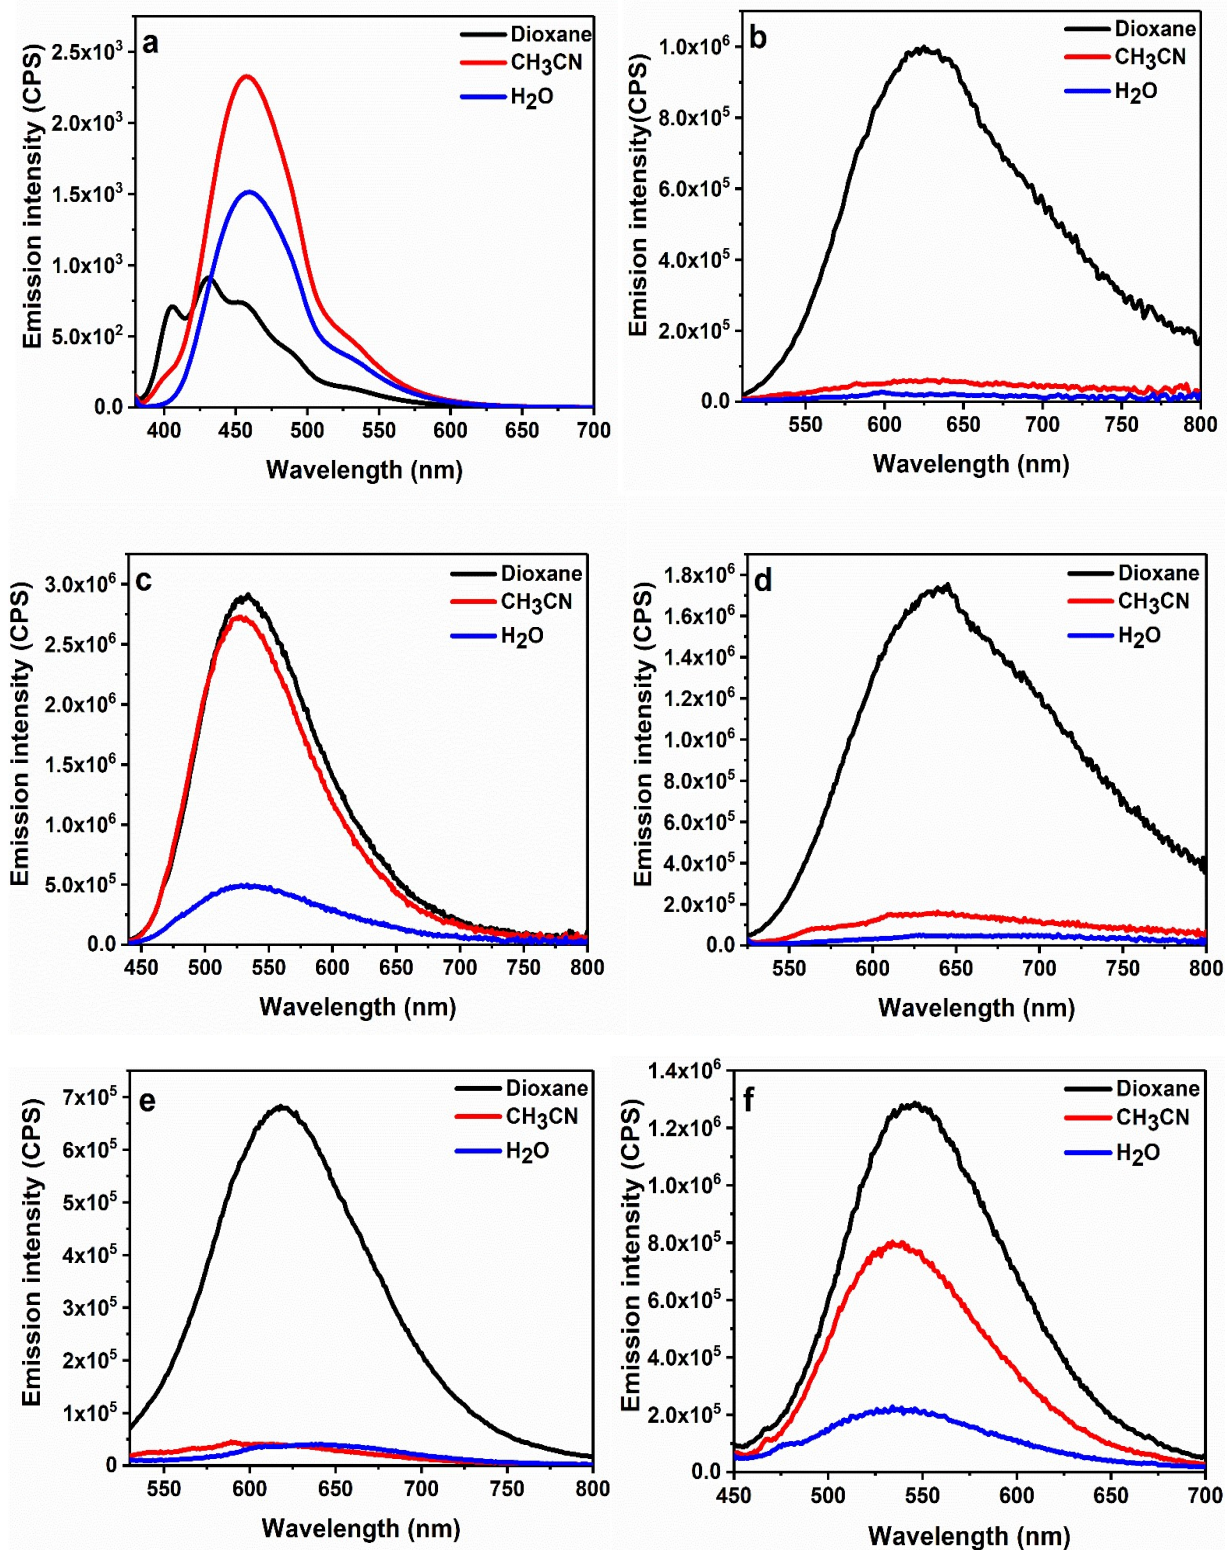

Fig S3: Spectra a-f represents emission spectra for molecules 1-4,6 and 7 respectively in different solvents.

Table S2: Absorption maxima, emission maxima and quantum yield for **1-7** in different solvents.

| <b>Probe</b> | <b>Solvents</b> | <b><math>\lambda_{\text{Abs max}}</math><br/>(nm)</b> | <b><math>\lambda_{\text{Em. Max}}</math><br/>(nm)</b> | <b>Stokes shift<br/>(nm)</b> | <b>% Q.Y.</b> |
|--------------|-----------------|-------------------------------------------------------|-------------------------------------------------------|------------------------------|---------------|
| <b>1</b>     | Dioxane         | 370                                                   | 433                                                   | 63                           | 0.8           |
|              | Acetonitrile    | 368                                                   | 458                                                   | 90                           | 1.5           |
|              | Water           | 370                                                   | 458                                                   | 88                           | 2.7           |
| <b>2</b>     | Dioxane         | 490                                                   | 625                                                   | 135                          | 0.1           |
|              | Acetonitrile    | 490                                                   | 625                                                   | 135                          | 0.03          |
|              | Water           | 466                                                   | 610                                                   | 144                          | 0.04          |
| <b>3</b>     | Dioxane         | 400                                                   | 530                                                   | 130                          | 0.4           |
|              | Acetonitrile    | 400                                                   | 530                                                   | 130                          | 1.9           |
|              | Water           | 395                                                   | 530                                                   | 135                          | 0.5           |
| <b>4</b>     | Dioxane         | 500                                                   | 640                                                   | 140                          | 0.2           |
|              | Acetonitrile    | 505                                                   | 635                                                   | 130                          | 0.03          |
|              | Water           | 487                                                   | 635                                                   | 148                          | 0.05          |
| <b>5</b>     | Dioxane         | 416                                                   | 545                                                   | 129                          | 0.6           |
|              | Acetonitrile    | 412                                                   | 535                                                   | 123                          | 2.2           |
|              | Water           | 404                                                   | 540                                                   | 136                          | 0.6           |
| <b>6</b>     | Dioxane         | 500                                                   | 618                                                   | 118                          | 0.2           |
|              | Acetonitrile    | 500                                                   | 600                                                   | 100                          | 0.03          |
|              | Water           | 485                                                   | 625                                                   | 140                          | 0.07          |
| <b>7</b>     | Dioxane         | 410                                                   | 540                                                   | 130                          | 1.1           |
|              | Acetonitrile    | 410                                                   | 530                                                   | 120                          | 0.8           |
|              | Water           | 400                                                   | 525                                                   | 125                          | 0.6           |



## Effect of viscosity: emission in glycerol-water mixture

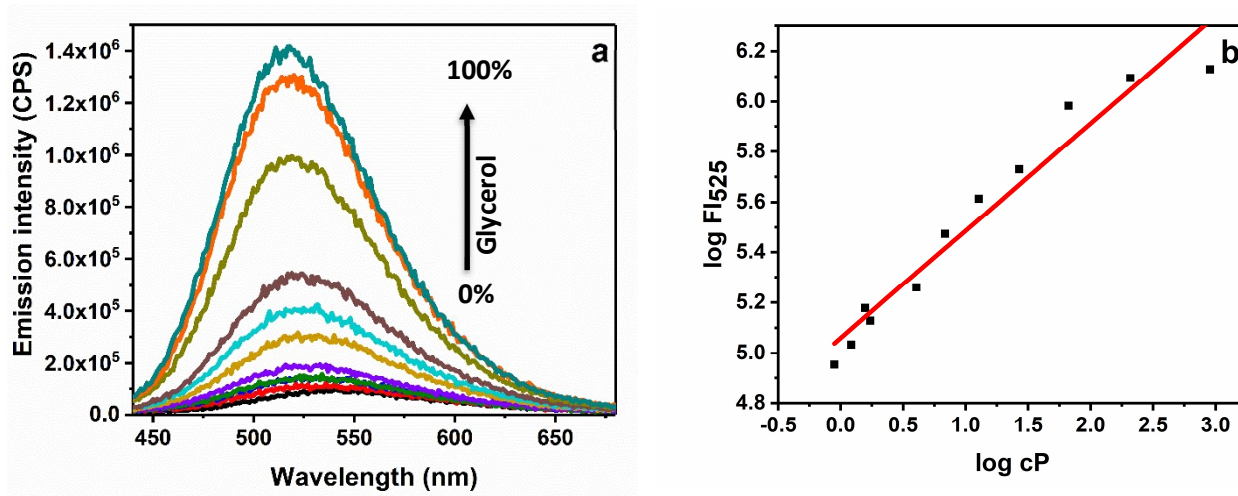

Fig S4: (a)- Fluorescence emission spectral changes of **7** with increasing (0-100%) glycerol concentrations in water. (b)- Linear relationship between  $\log FI_{525}$  and  $\log cP$ .

## Sub-Cellular Imaging

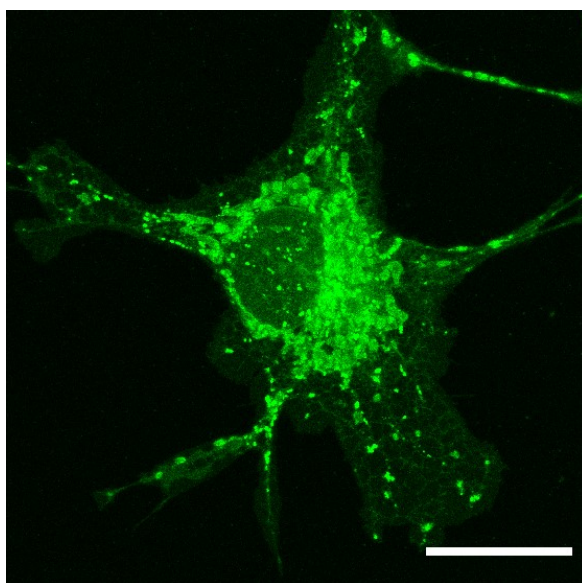

Fig S5: COS-7 cells incubated with **4** [400 nM] showing mesh-like structures in some cells indicating possible localization in ER also. The scale bar is 10  $\mu m$ .

CCCP treatment of COS-7 cells with 4

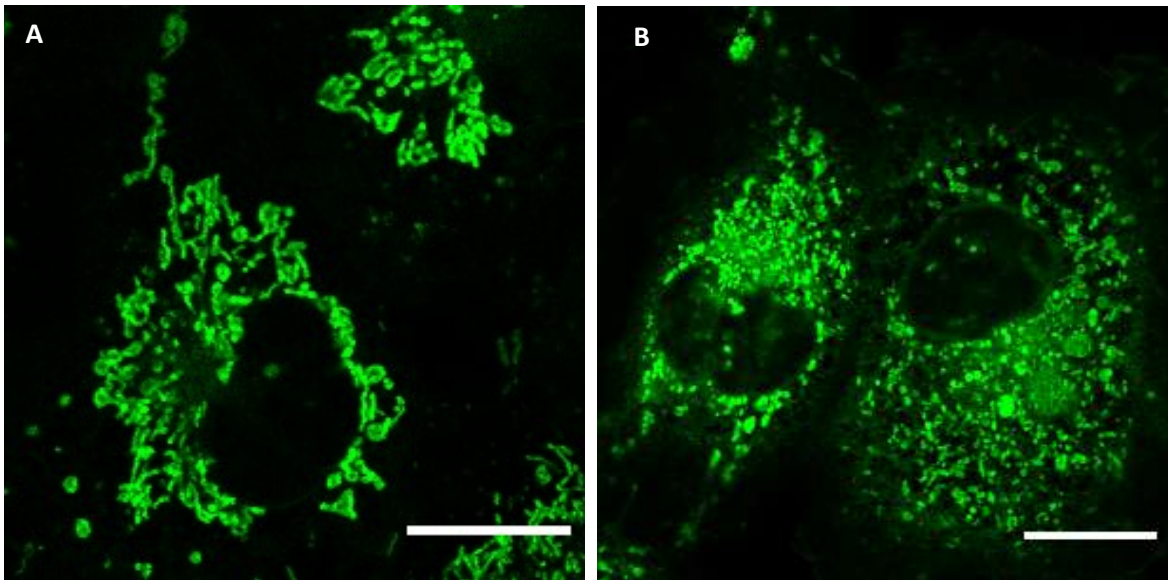

Fig S6: (A) COS-7 cells incubated with **4** at 400 nM concentration. (B) Cells treated with 10  $\mu$ M CCCP for 90 minutes followed by the addition of the fluorophore. Scale bar is 10  $\mu$ m.

## MTT assay data:

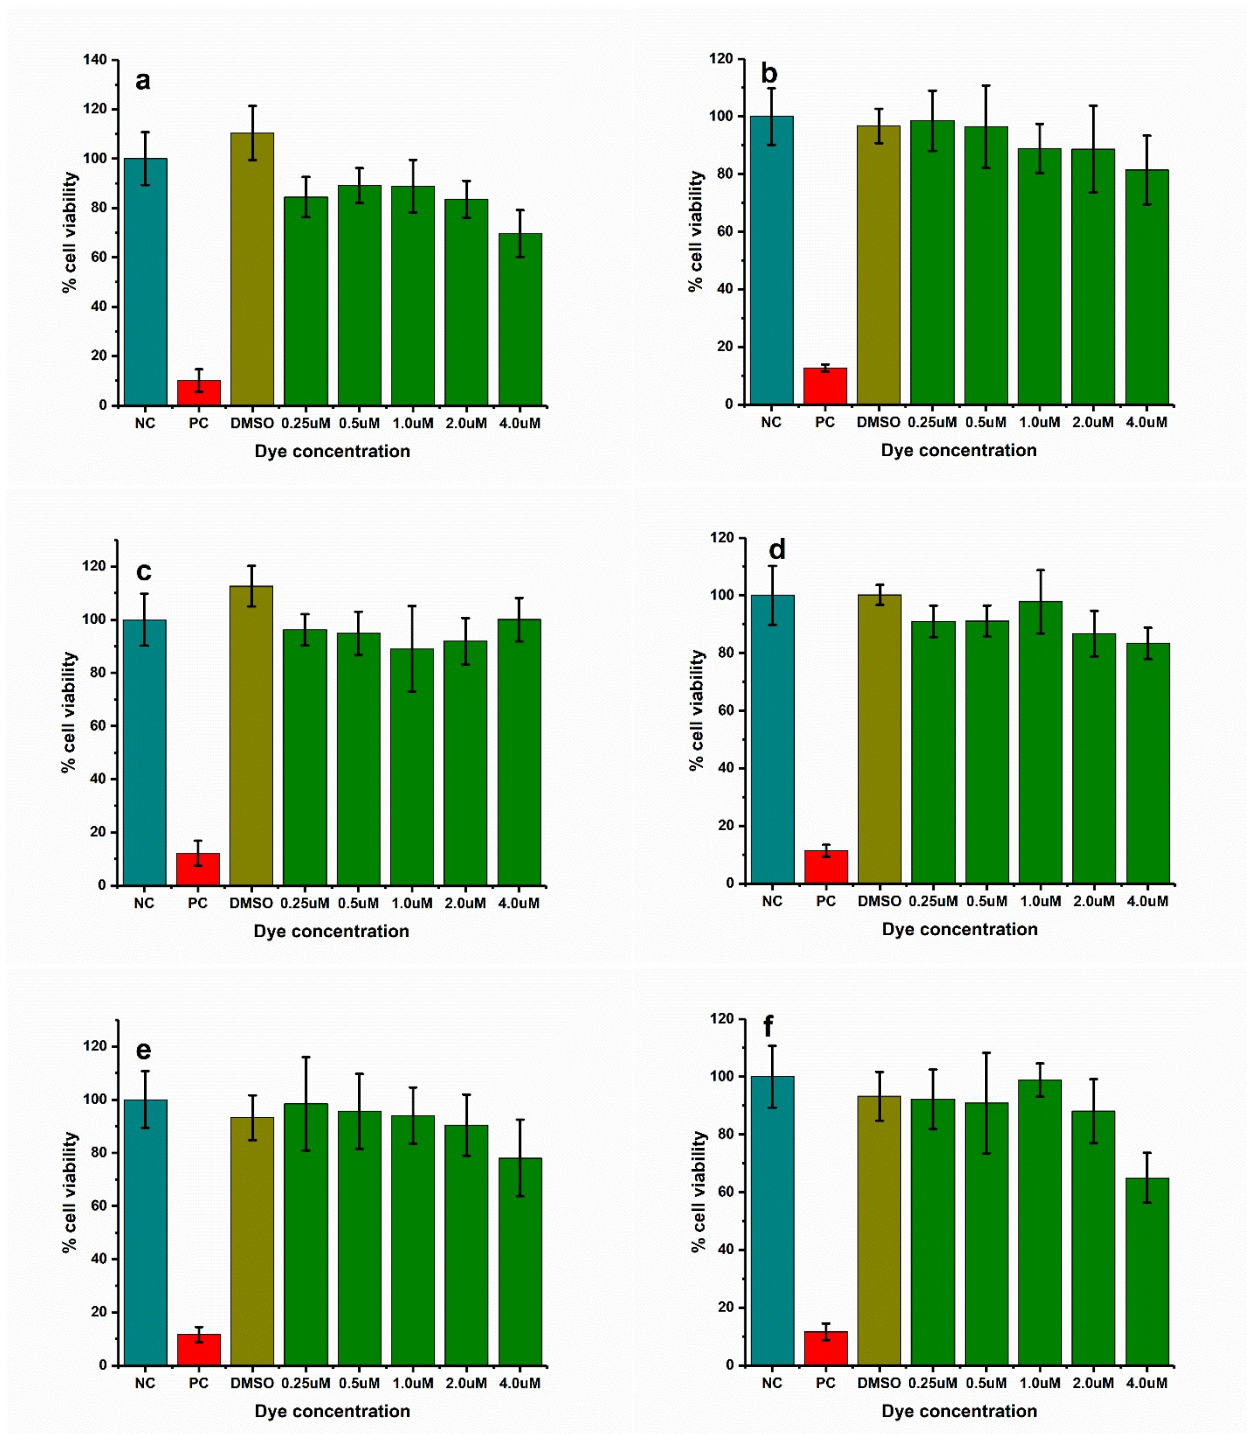

Fig S7: Bar graphs a-f represents MTT assay data for probes 2, 3, 4, 5, 6 and 7 respectively. The molecules are non-toxic at the imaging concentrations. PC is positive control and NC is neutral control.

Viscosity detection with 7 in COS-7 cells:

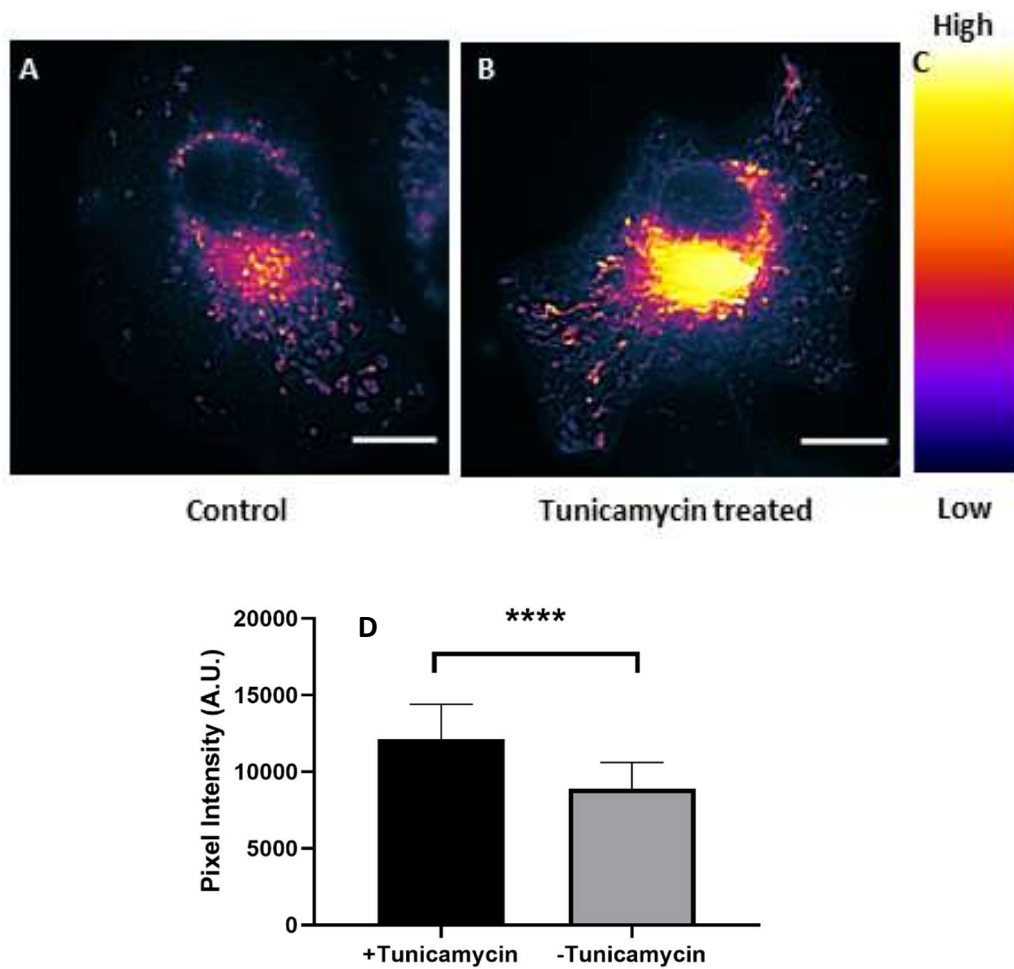

Fig S8: Viscosity detection in COS-7 cells. A is the control cell images treated with only **7** (800 nM); B represents cells treated with Tunicamycin (Tm) at 20 µg/ml concentration and **7** (800nM). C shows color bar and D pixel intensity graph for **7**. scale bar is 10 µm. 30 cells were used for each set of probes for quantification. P values were calculated using two-sample t-tests: \*\*\*\*p < 0.05 A total of 30 cells were taken into account for this calculation for each molecule. The color bar indicates bright yellow to the highest pixel intensity and black to lowest pixel intensity.

# <sup>1</sup>H, <sup>13</sup>C and <sup>19</sup>F NMR spectra

<sup>1</sup>H and <sup>13</sup>C spectra for 1

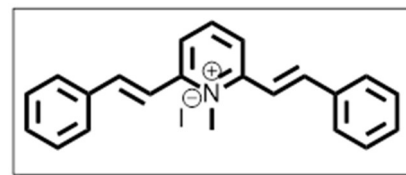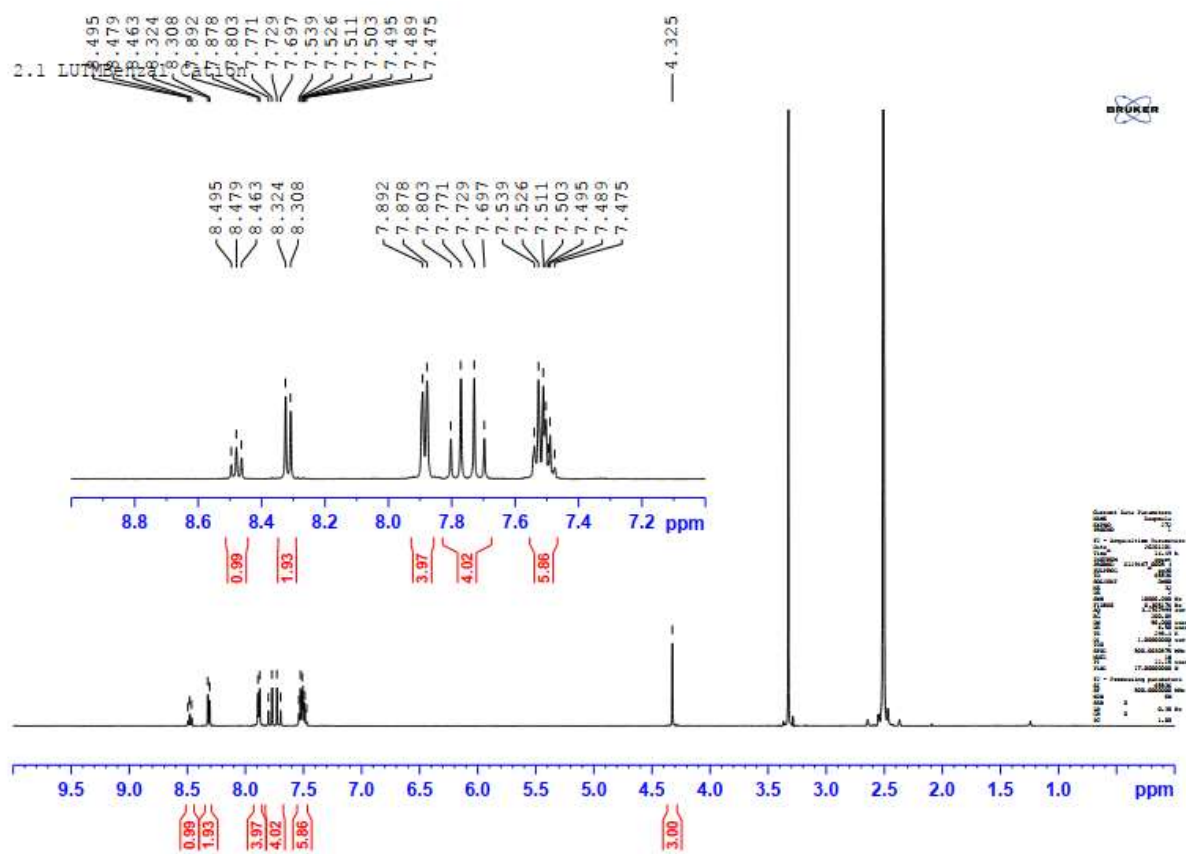

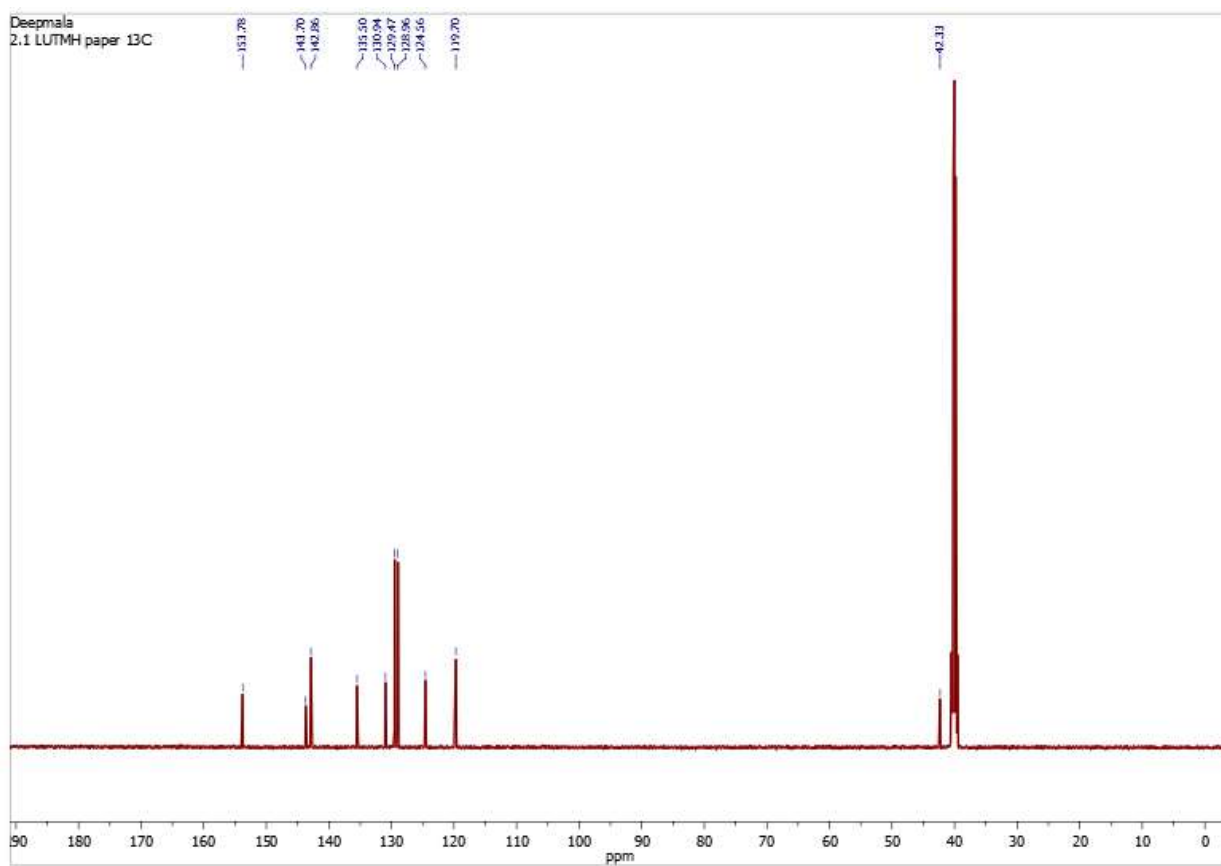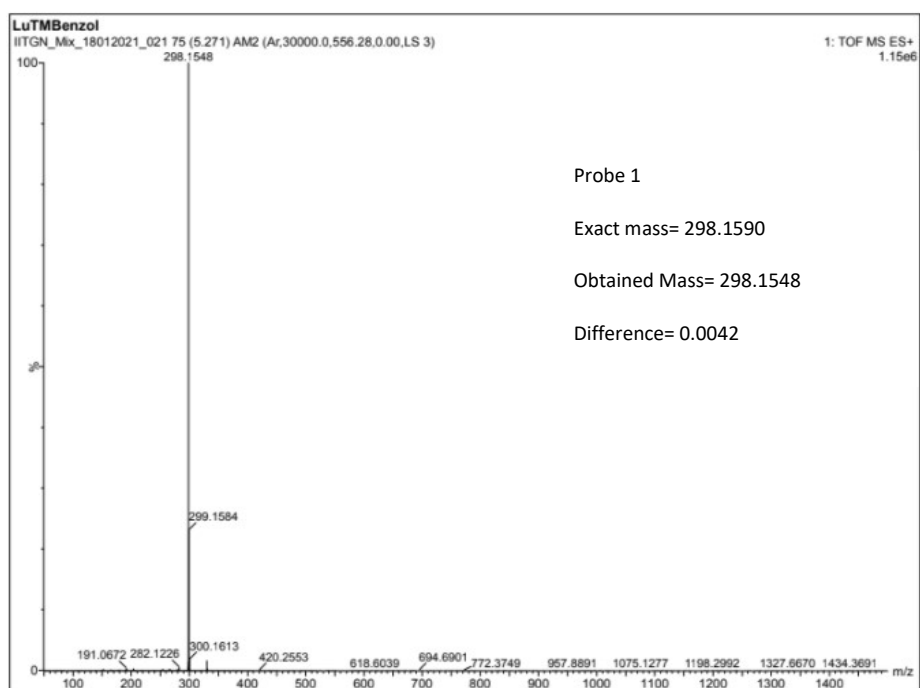

Fig S9:  $^1\text{H}$ ,  $^{13}\text{C}$  and HRMS spectra for 1

<sup>1</sup>H and <sup>13</sup>C spectra for 2

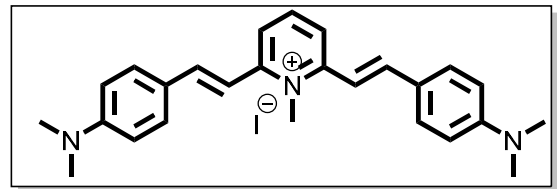

aakash

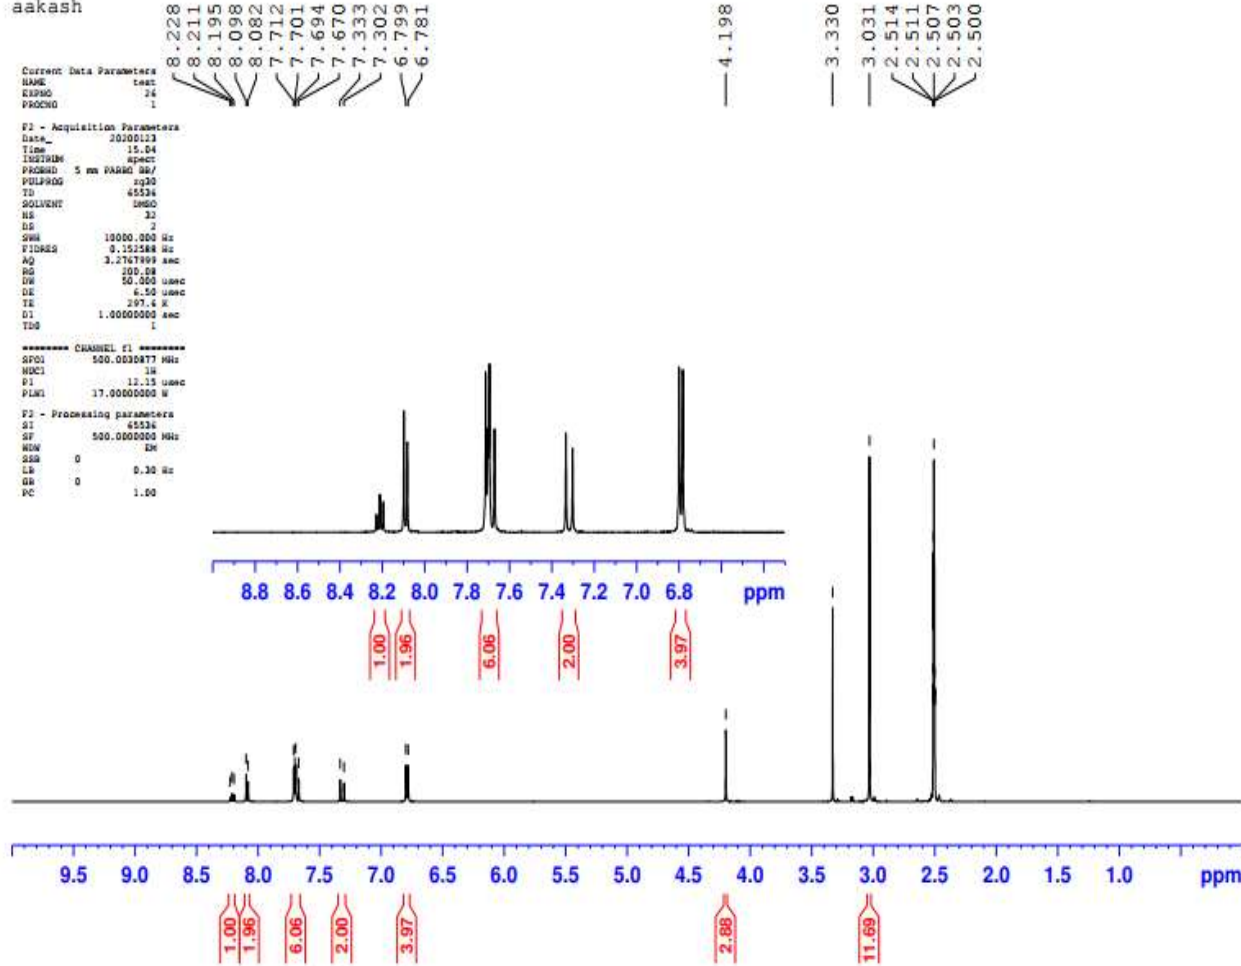

Acti

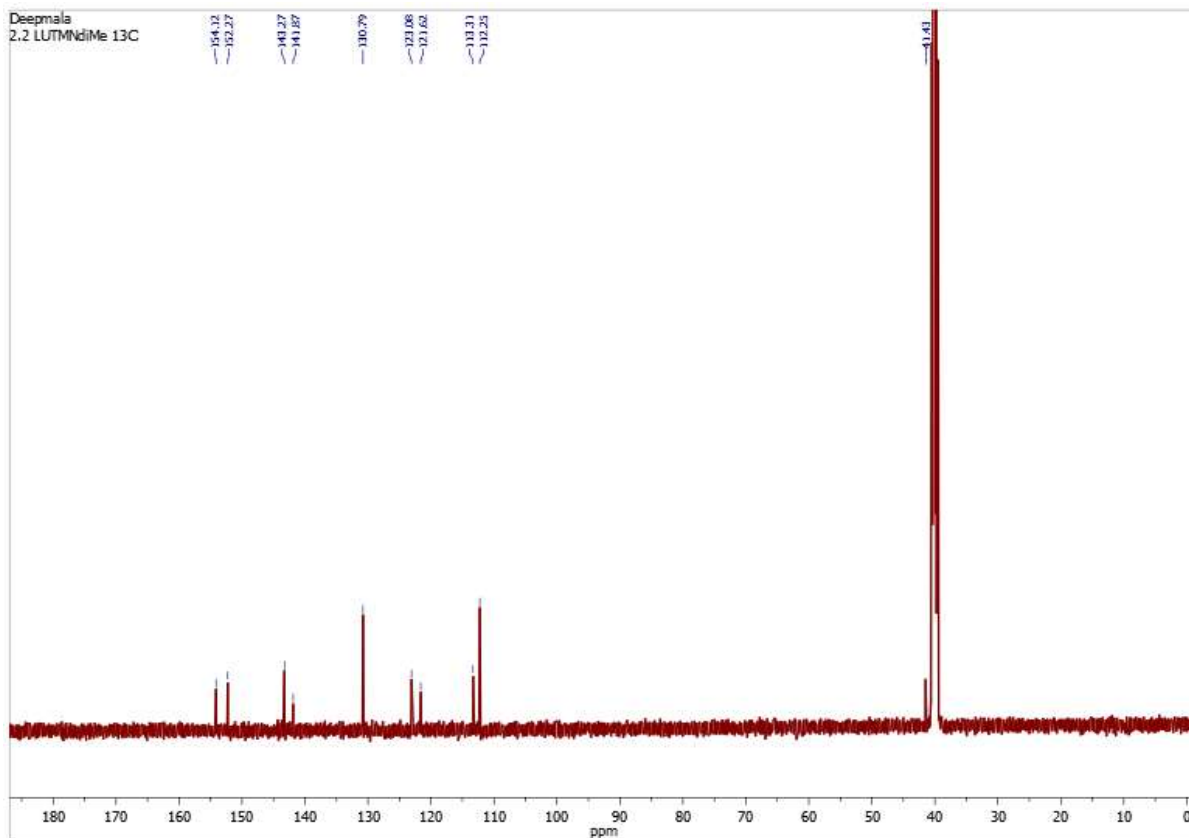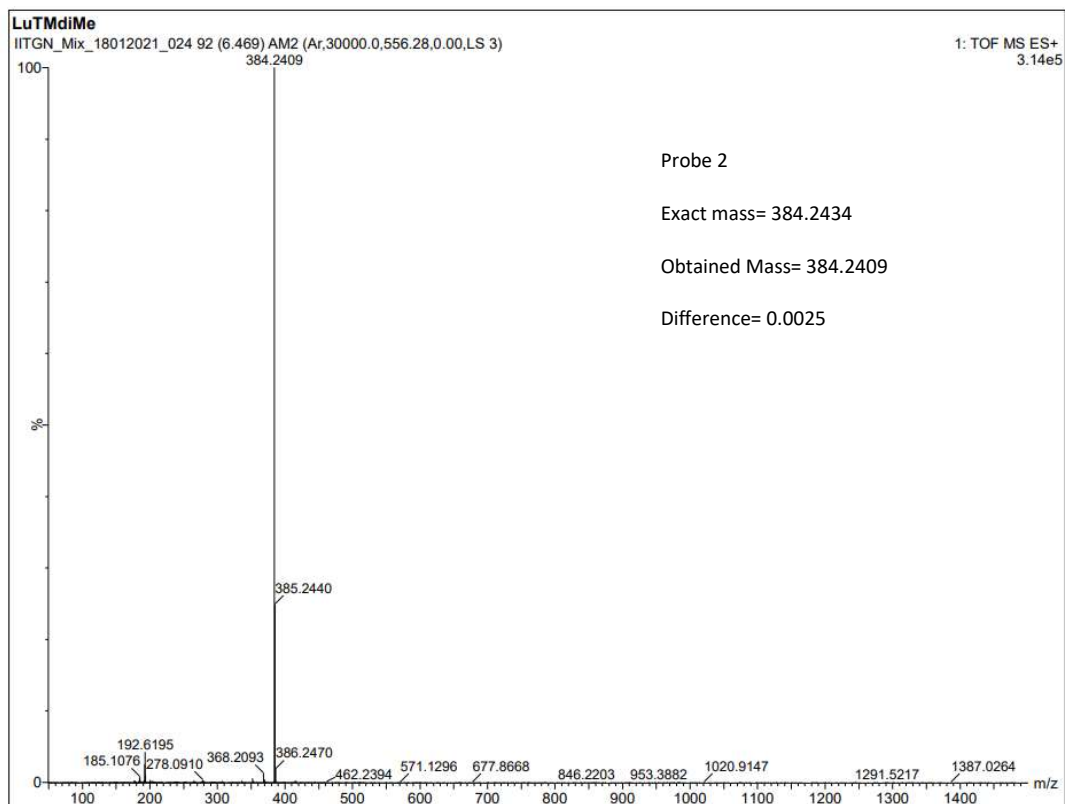

Fig S10:  $^1\text{H}$ ,  $^{13}\text{C}$  and HRMS spectra for 2



<sup>1</sup>H and <sup>13</sup>C spectra for 3

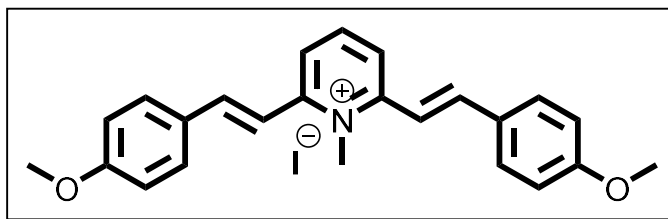

lutidine\_anisaldehyde

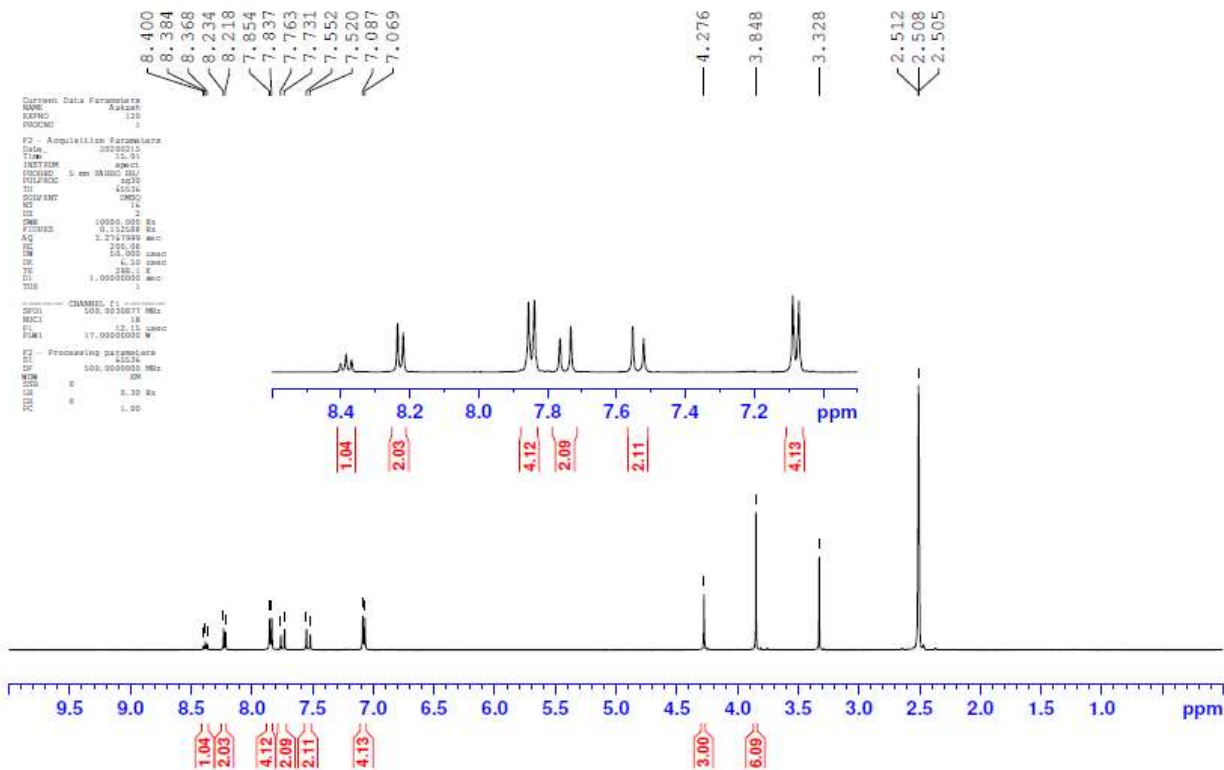

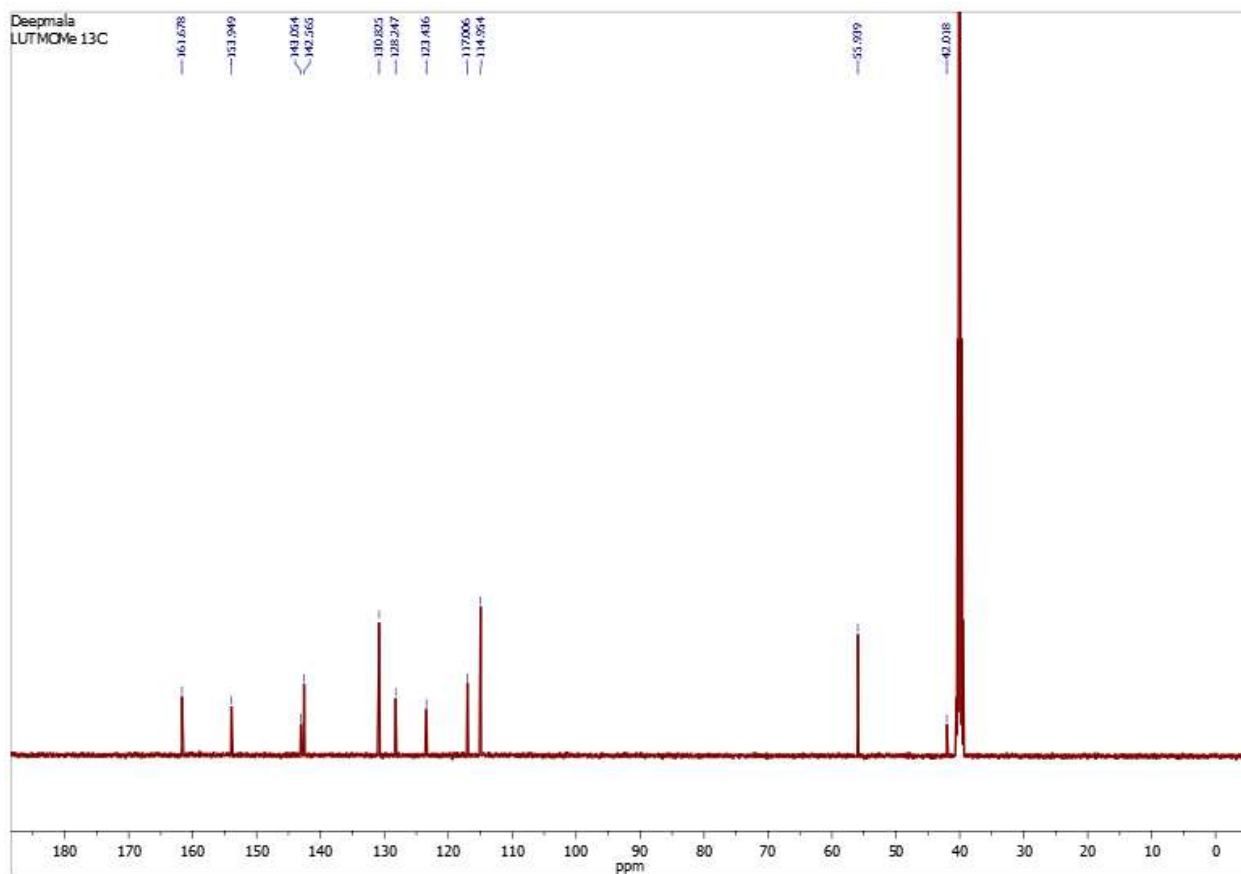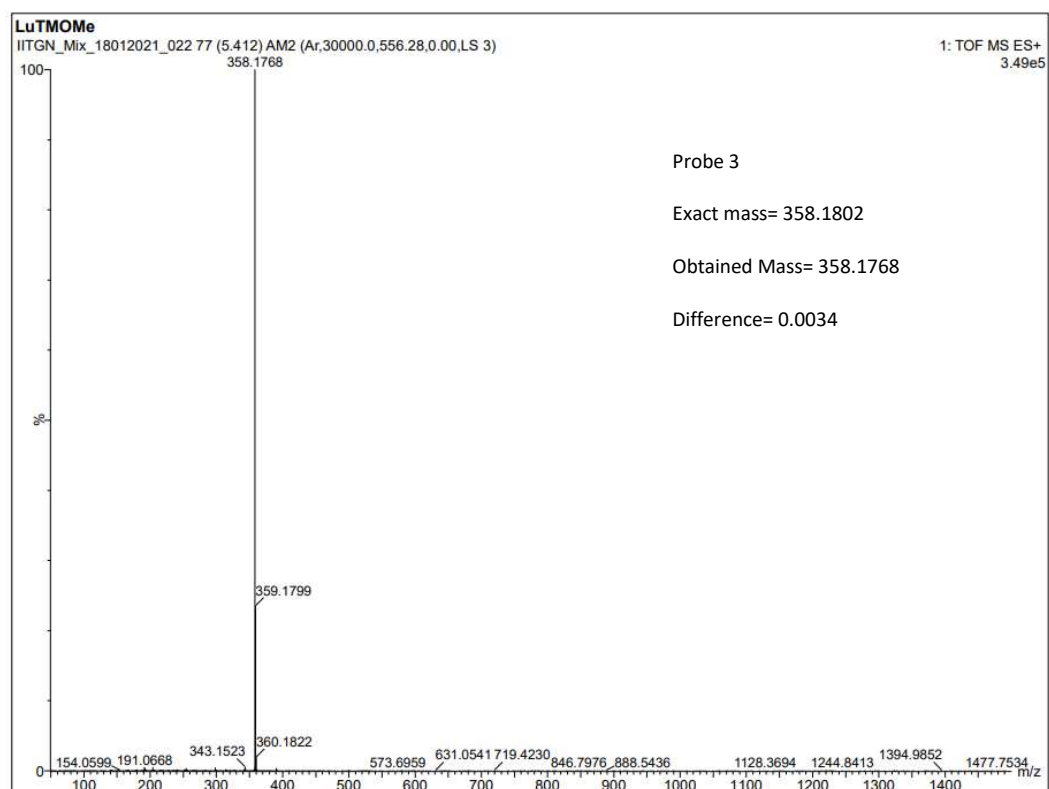

Fig S11:  $^1\text{H}$ ,  $^{13}\text{C}$  and HRMS spectra for 3

$^1\text{H}$  and  $^{13}\text{C}$  for **4**

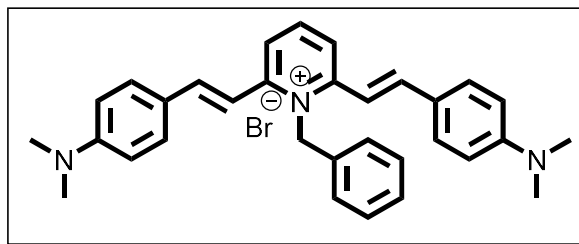

Deepmala  
2.7 LUTBzNdiMe 1H paper

8.2183  
8.2020  
8.2059  
8.2020  
7.7623  
7.7313  
7.5555  
7.5377  
7.4000  
7.2428  
7.2275  
6.7325  
6.1459

Deepmala  
2.7 LUTBzNdiMe 1H paper

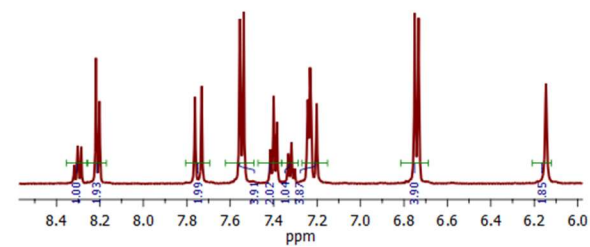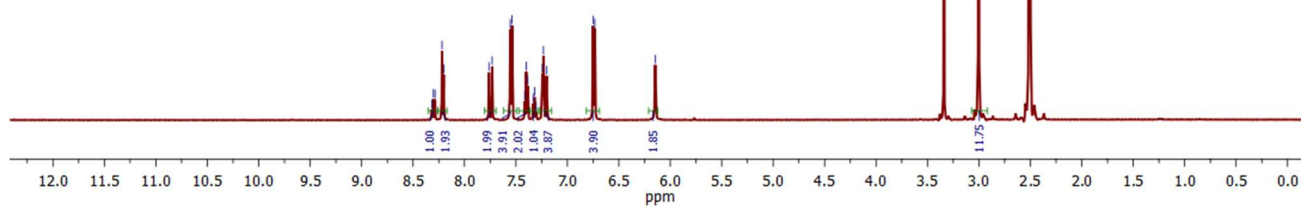

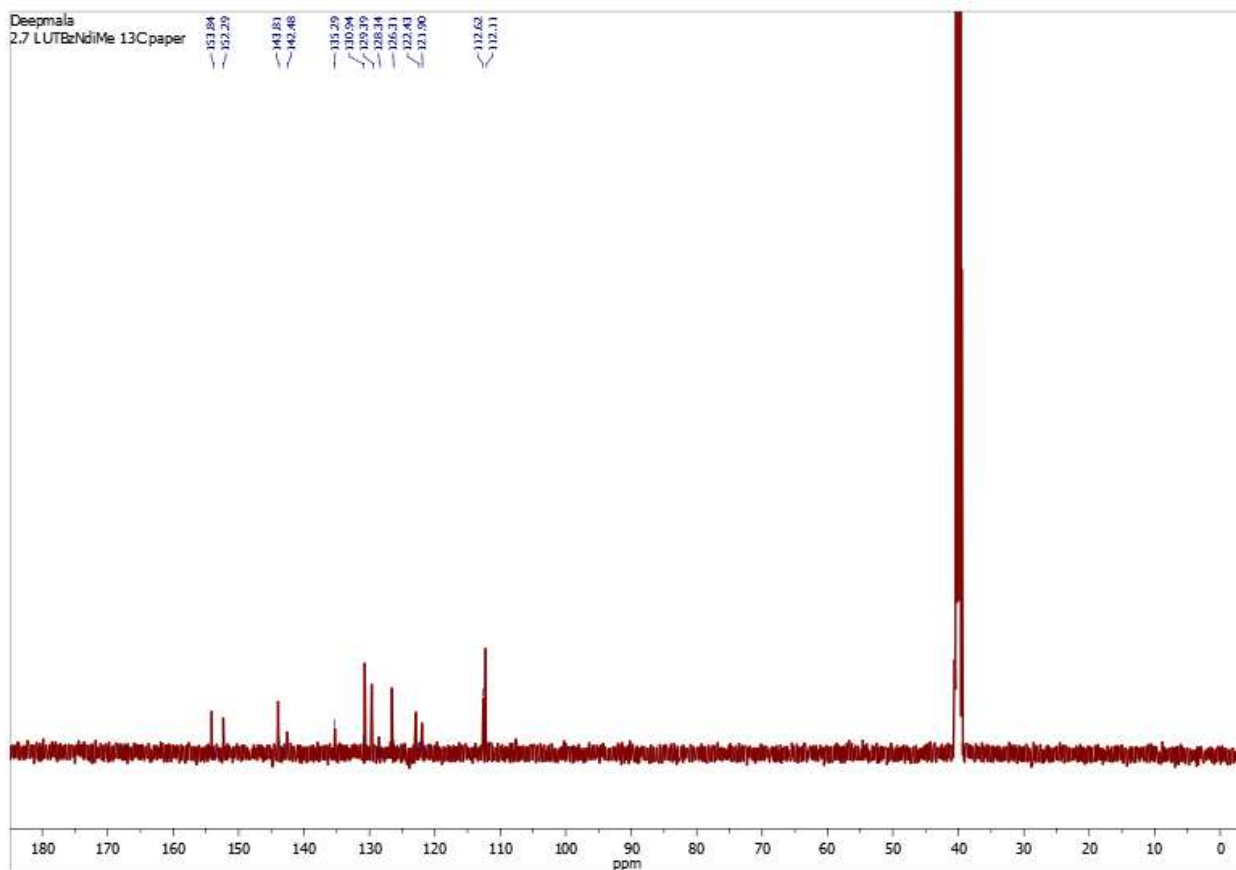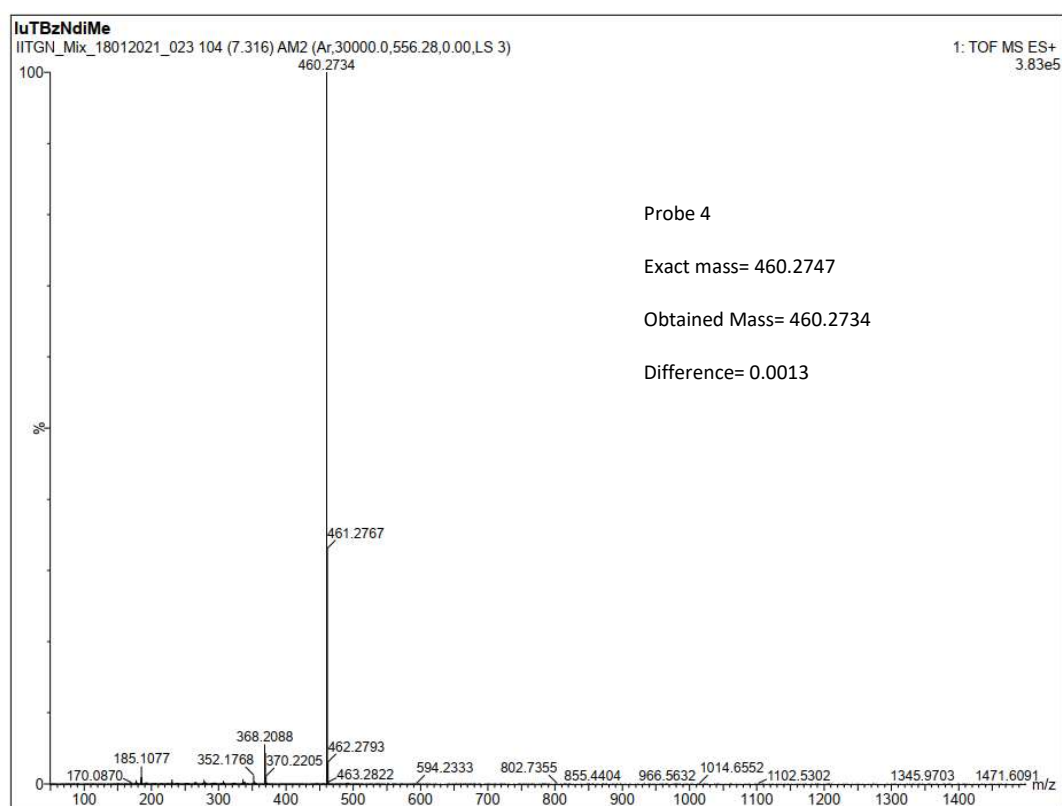

Fig S12:  $^1\text{H}$ ,  $^{13}\text{C}$  and HRMS spectra for 4

$^1\text{H}$  and  $^{13}\text{C}$  NMR spectra for 5

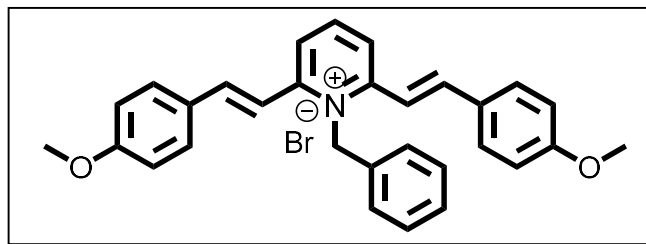

Deepmala  
2.5 LUTBzOMe 1H paper

8.50  
8.49  
8.47  
8.37  
8.36  
7.81  
7.78  
7.73  
7.71  
7.51  
7.48  
7.34  
7.22  
7.04  
6.97

Deepmala  
2.5 LUTBzOMe 1H paper

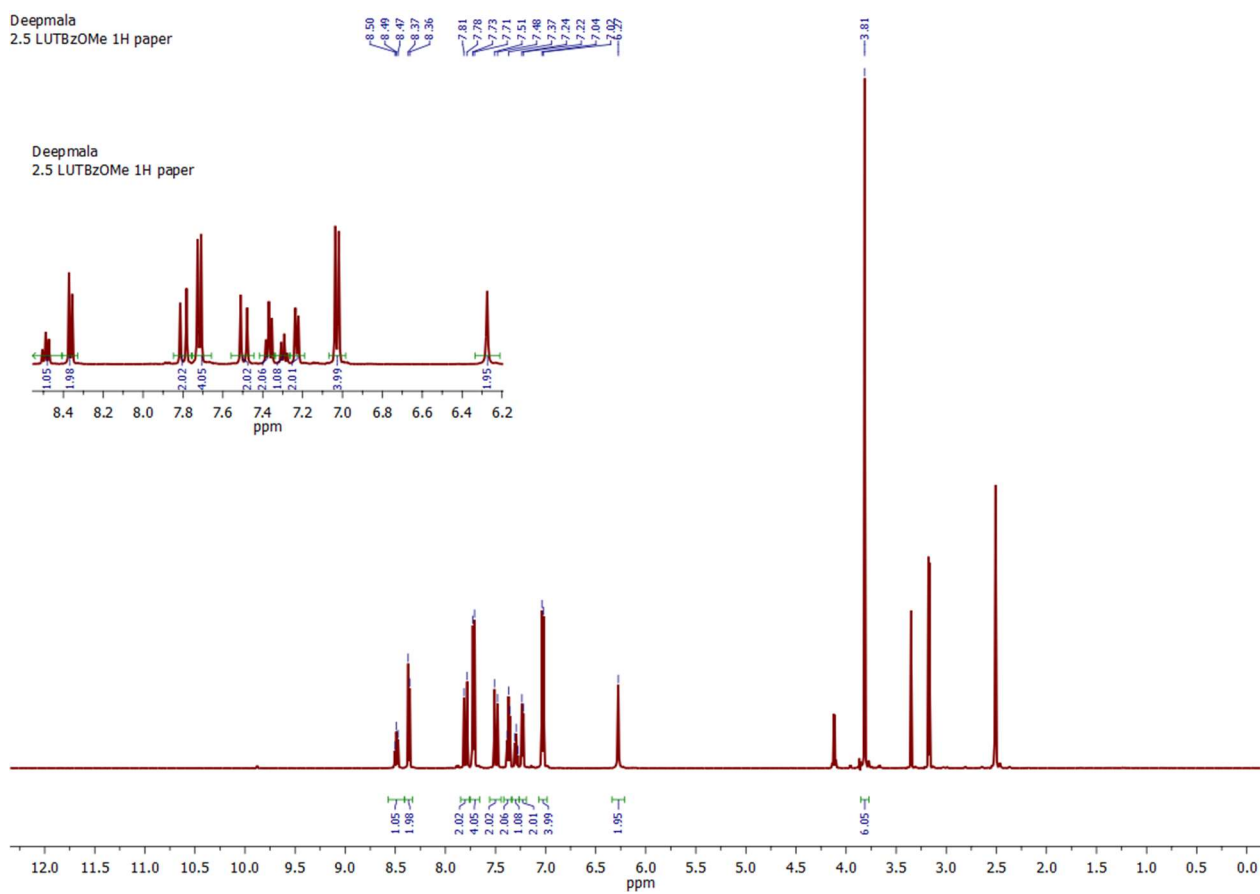

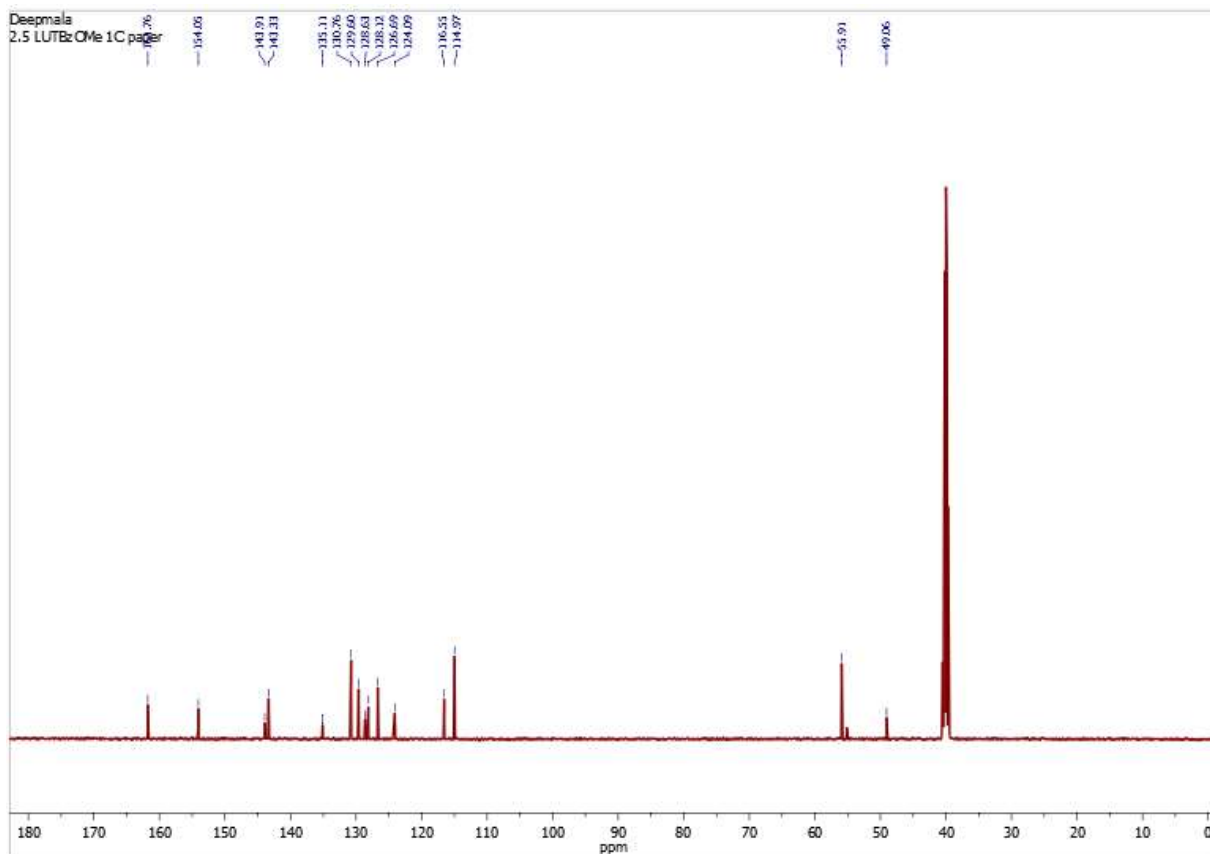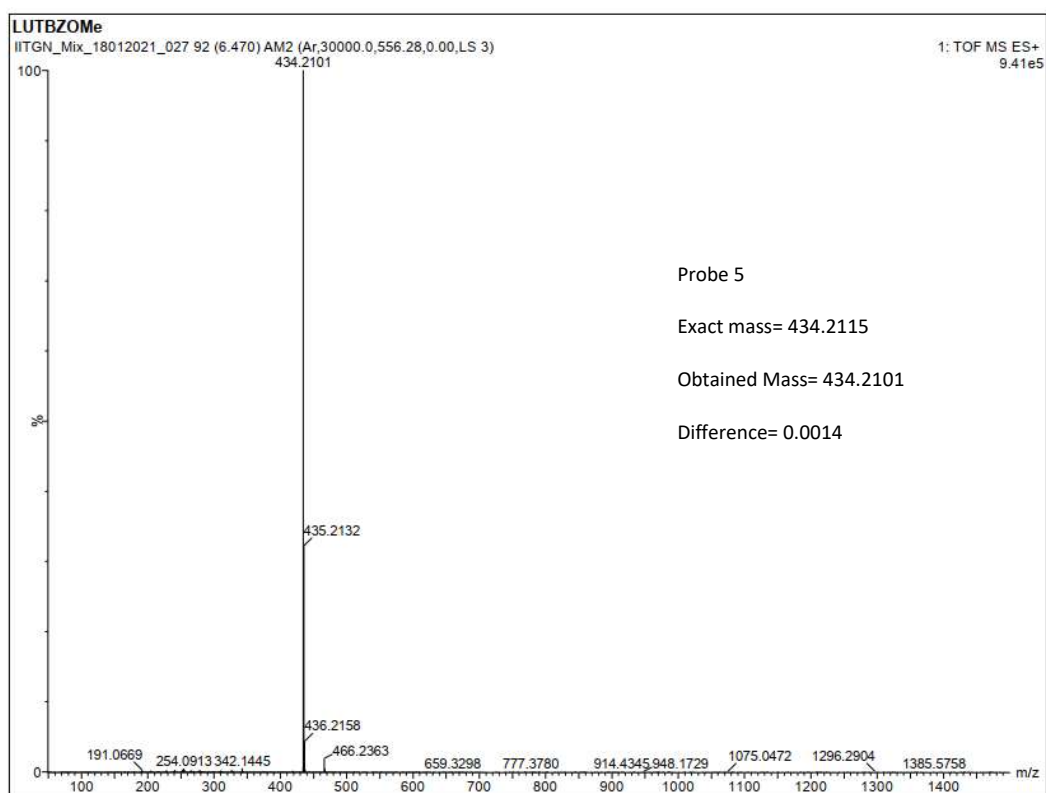

Fig S13:  $^1\text{H}$ ,  $^{13}\text{C}$  and HRMS spectra for **5**

2,6-dimethyl-1-((perfluorophenyl)methyl) pyridin-1-ium (intermediate for the preparation of **6** and **7**)

$^1\text{H}$  and  $^{19}\text{F}$  (The molecule is known previously in the literature<sup>9</sup>)

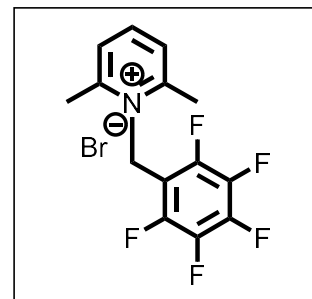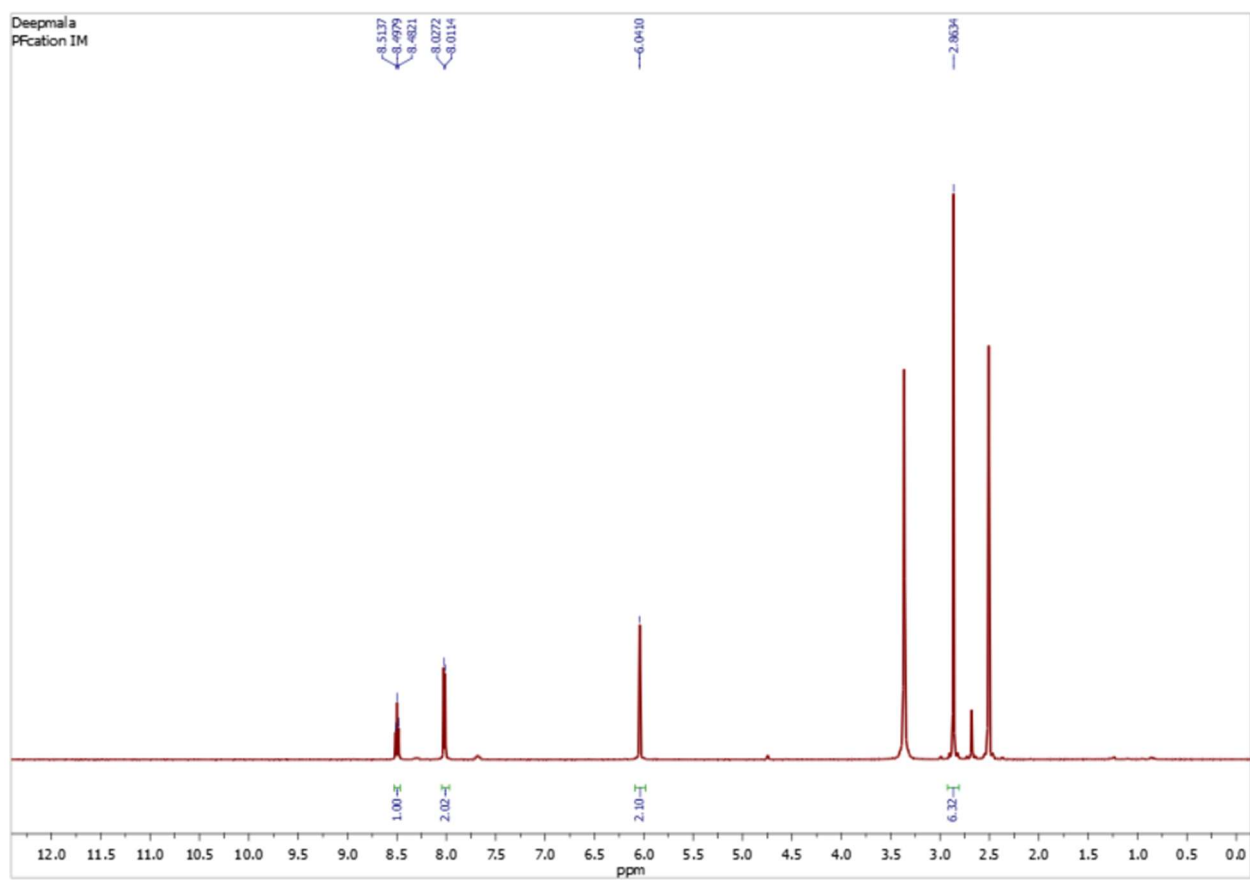

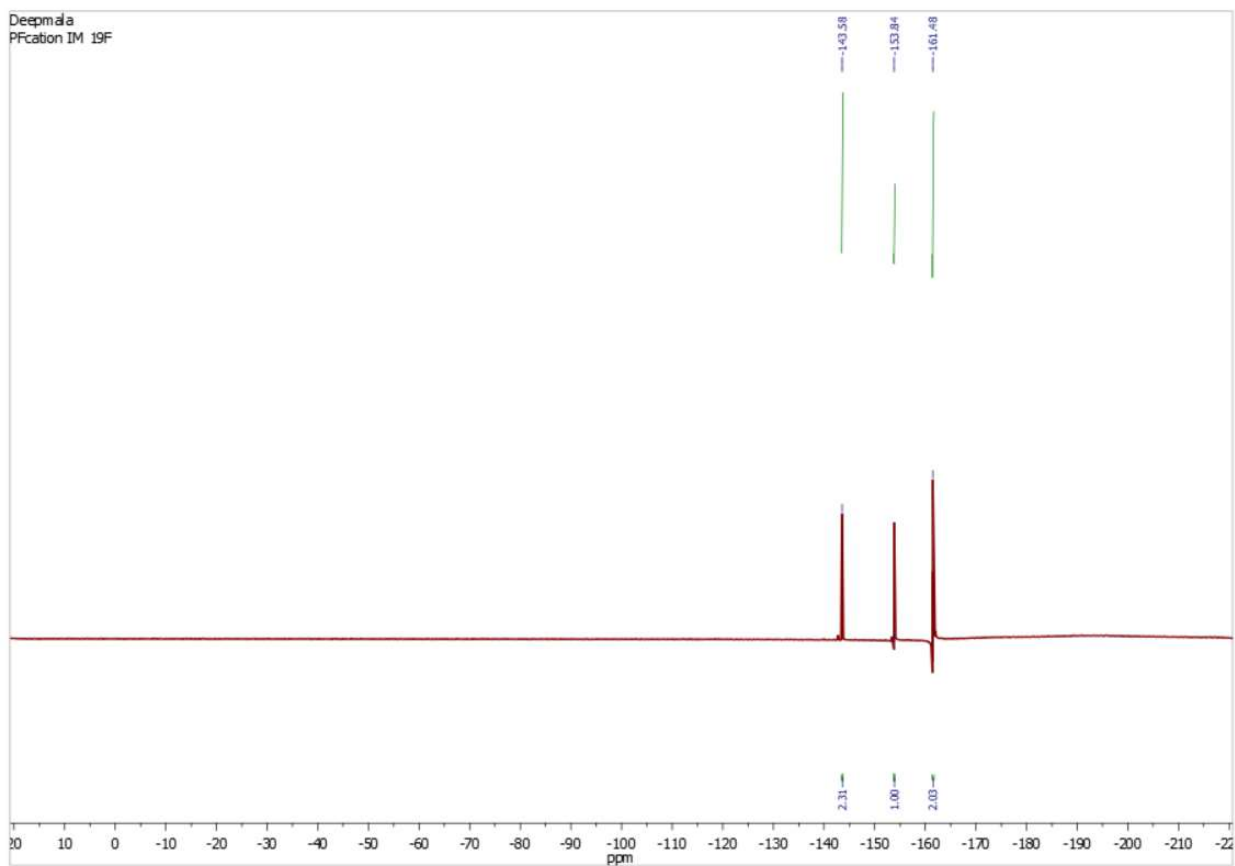

Fig S14:  $^1\text{H}$  and  $^{19}\text{F}$  spectra for 2,6-dimethyl-1-((perfluorophenyl)methyl)pyridin-1-ium



$^1\text{H}$  and  $^{13}\text{C}$  and  $^{19}\text{F}$  NMR spectra for **6**

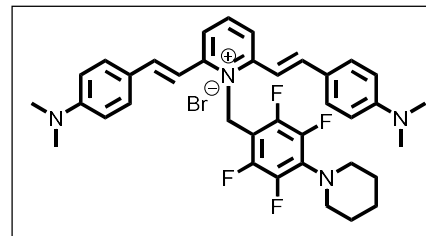

Deepmala  
3.1 LUTTFpNMe1st 25/6

8.2044  
8.1883  
8.1722  
7.8299  
7.8138  
7.5784  
7.5607  
7.3217  
7.2691  
6.8775  
6.6597  
-6.1519

Deepmala  
3.1 LUTTFpNMe1st 25/6

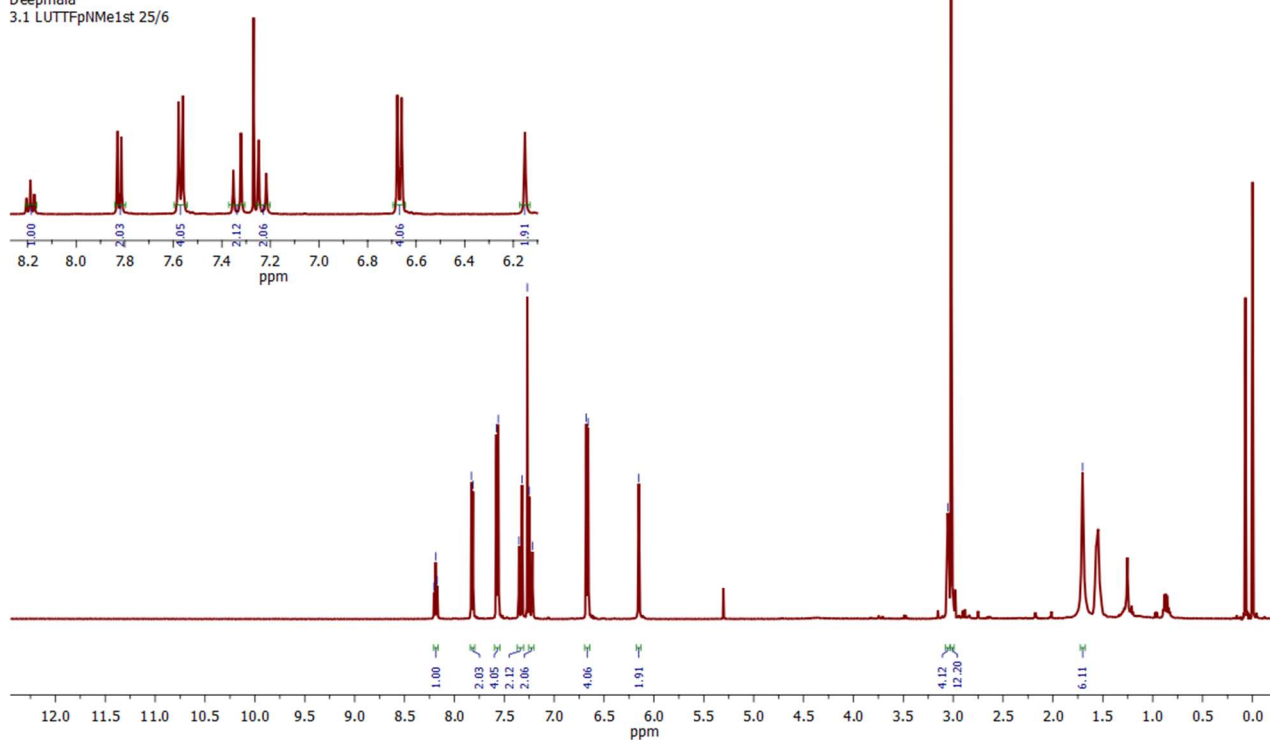

Deepmala  
LUTTFNMe 17\_10\_21 13C

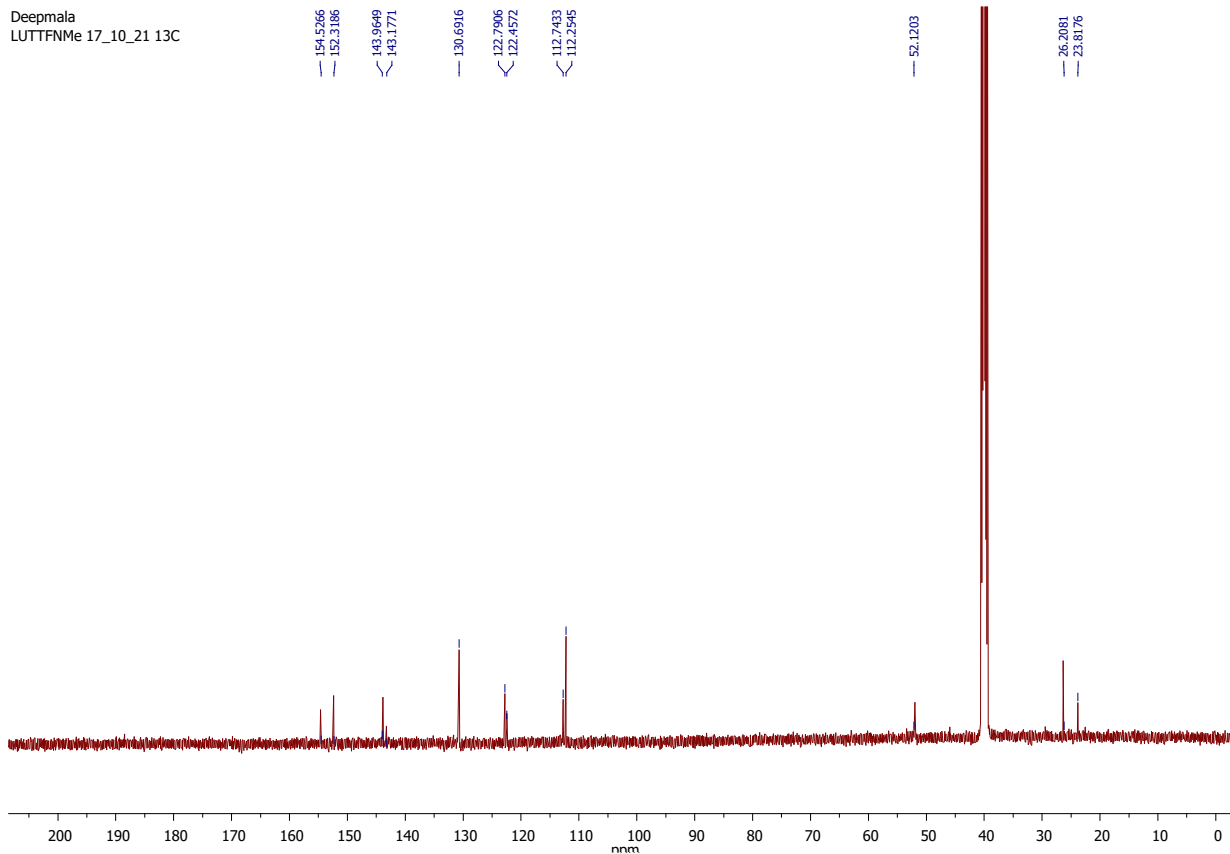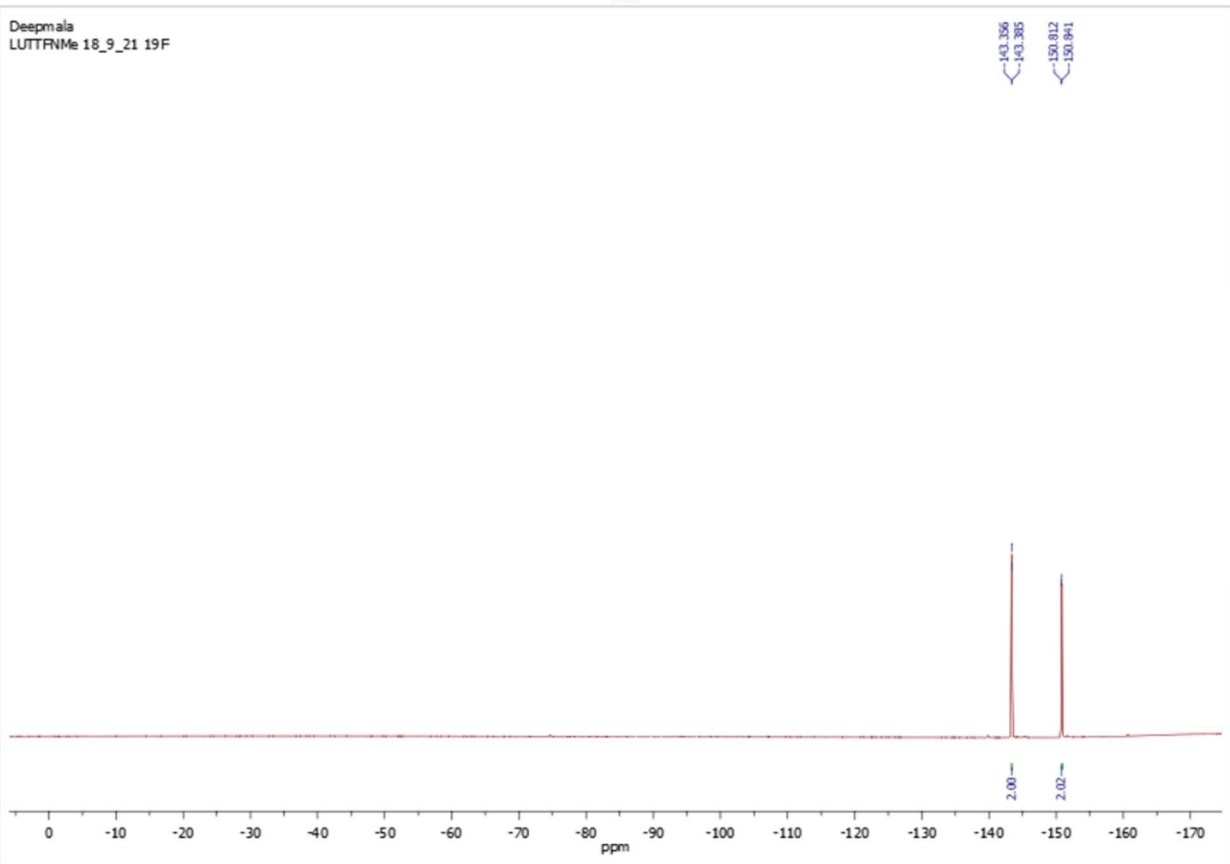

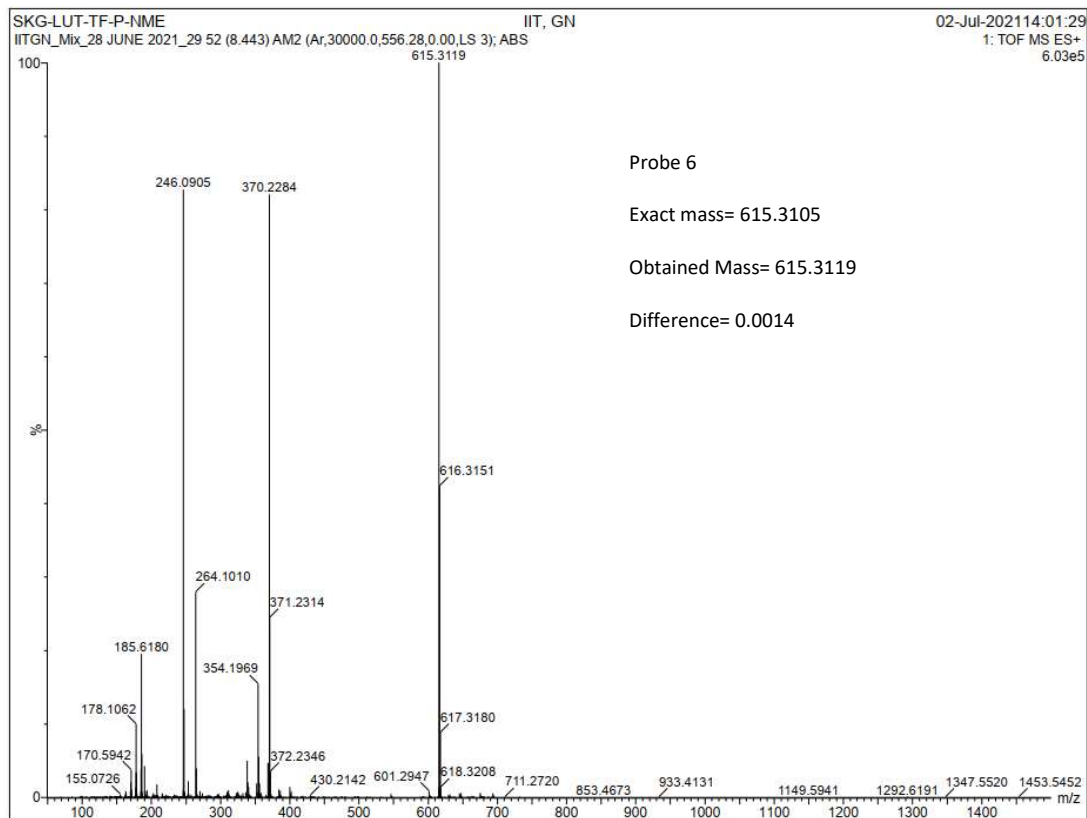

Fig S15:  $^1\text{H}$ ,  $^{13}\text{C}$ ,  $^{19}\text{F}$  and HRMS spectra for **6**

$^1\text{H}$  and  $^{13}\text{C}$  and  $^{19}\text{F}$  NMR for **7**

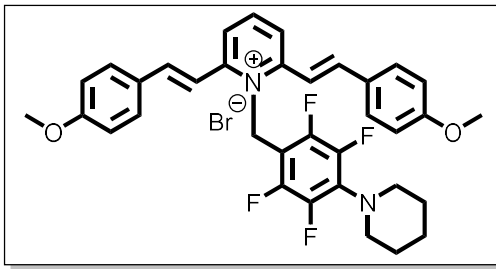

Deepmala  
LUTTFOMe 10\_10\_21

8.2544  
7.2583  
7.2224  
7.1981  
7.0563  
7.0390  
7.15125  
7.4809  
7.3902  
7.3587  
6.9219  
6.2823

3.8303

3.0357

1.5444

Deepmala  
LUTTFOMe 10\_10\_21

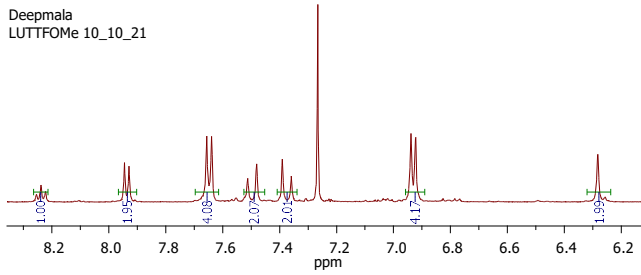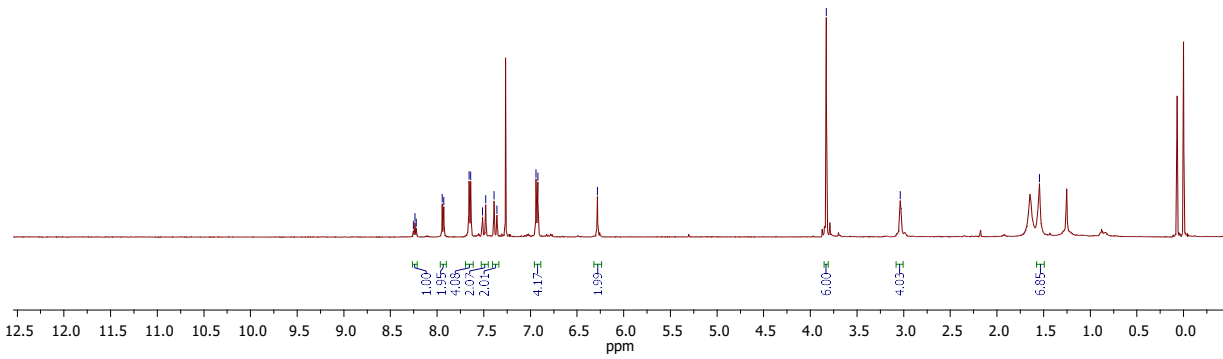

Deepmala  
LUTTFOMe\_13C\_carbon spectrum

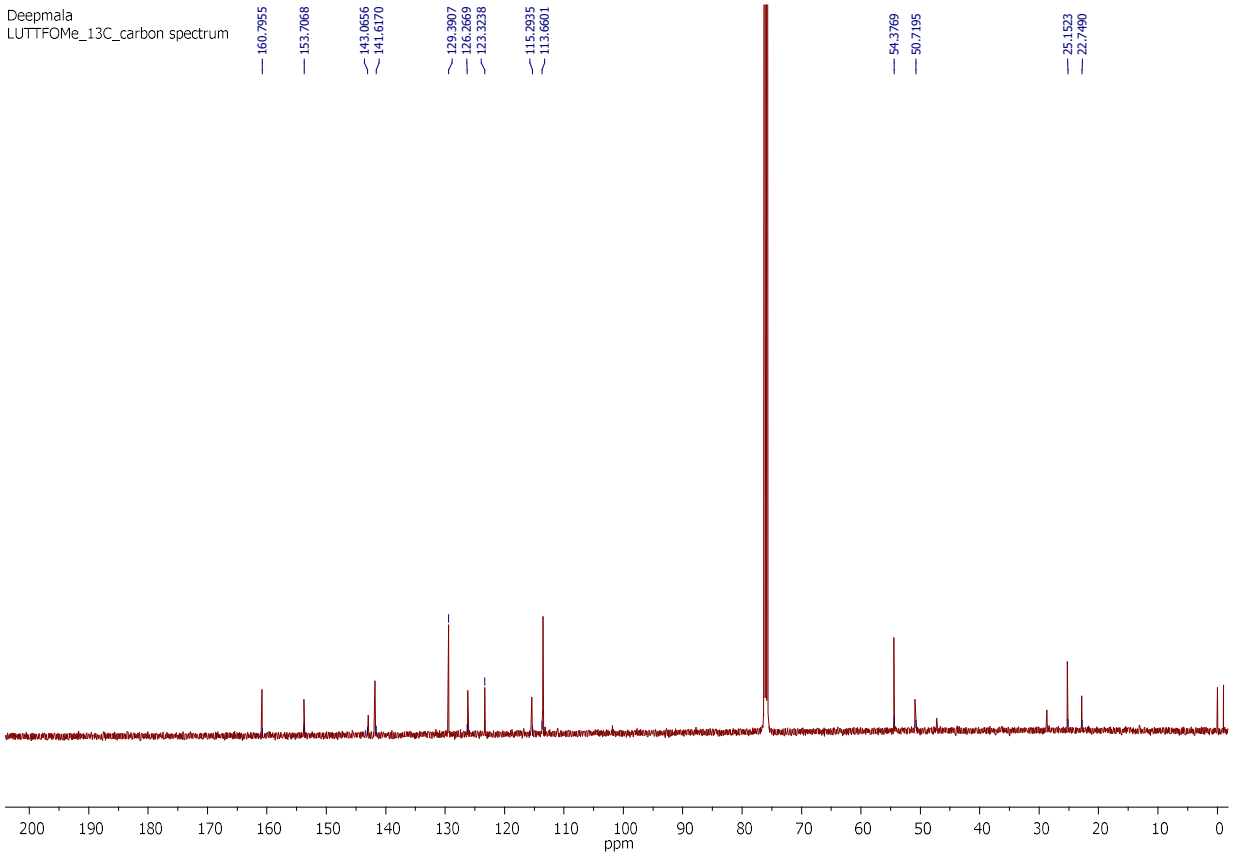

Deepmala  
LUTTFOMe 19\_9\_21 19F

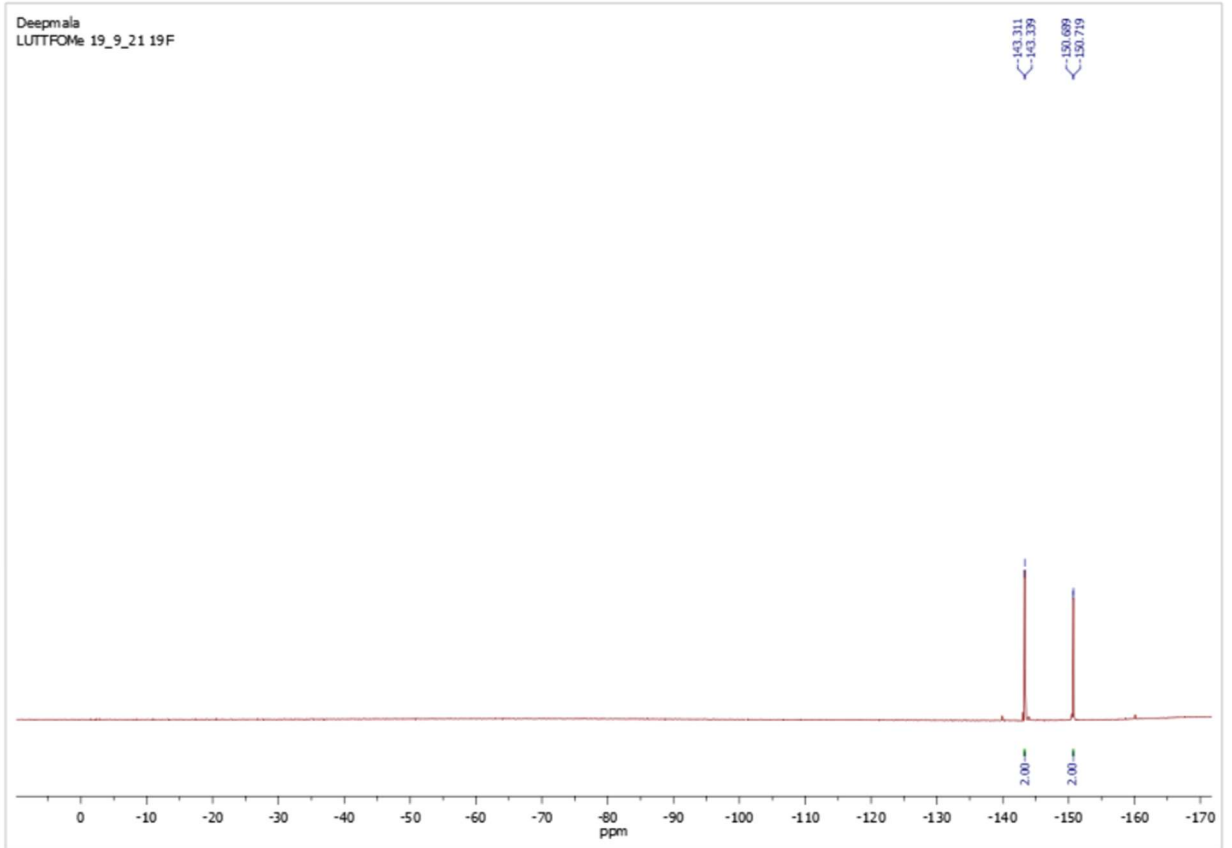

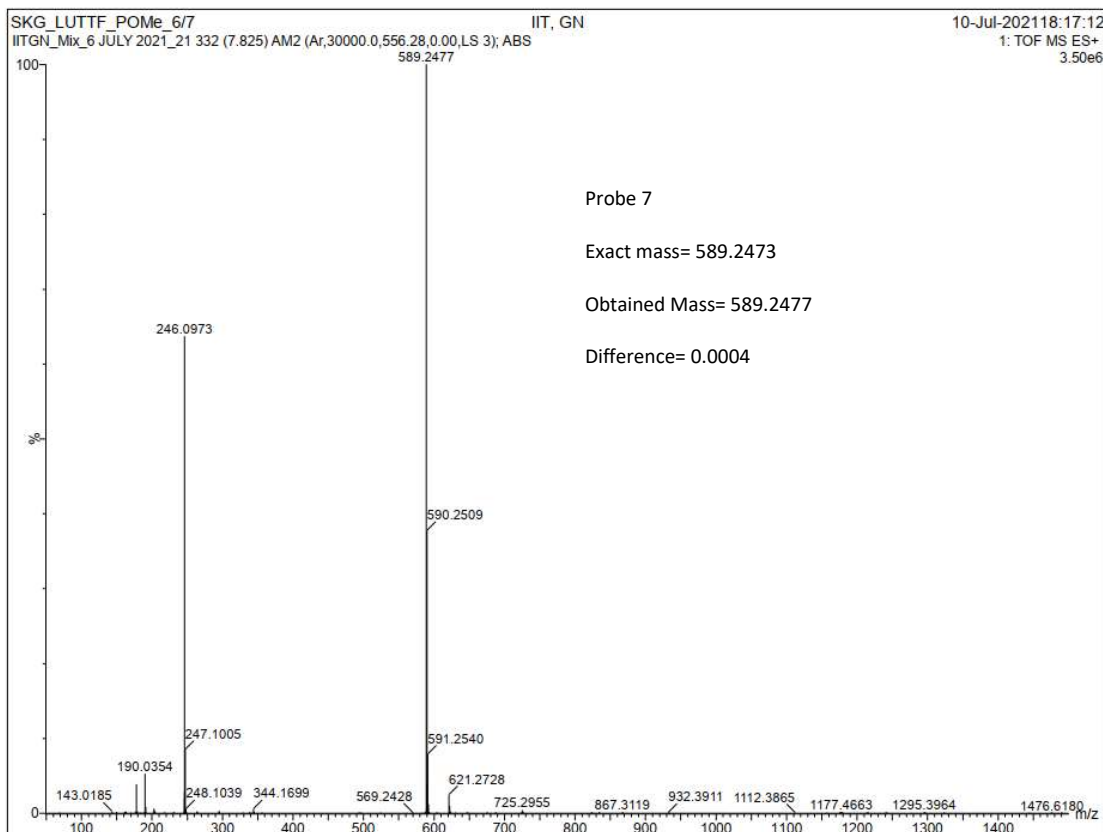

**Fig S16:**  $^1\text{H}$ ,  $^{13}\text{C}$ ,  $^{19}\text{F}$  and HRMS spectra for **7**

## References

1. R. I. Benhamou, Q. Z. Jaber, I. M. Herzog, Y. Roichman and M. Fridman, *ACS Chemical Biology*, 2018, **13**, 3325-3332.
2. N. Wagner, M. Stephan, D. Höglinger and A. Nadler, *Angewandte Chemie International Edition*, 2018, **57**, 13339-13343.
3. A. R. Sekhar, B. Mallik, V. Kumar and J. Sankar, *Organic & Biomolecular Chemistry*, 2019, **17**, 3732-3736.
4. D. I. Danylchuk, P.-H. Jouard and A. S. Klymchenko, *Journal of the American Chemical Society*, 2021, **143**, 912-924.
5. A. Goujon, A. Colom, K. Straková, V. Mercier, D. Mahecic, S. Manley, N. Sakai, A. Roux and S. Matile, *Journal of the American Chemical Society*, 2019, **141**, 3380-3384.
6. Y. Zhao, H. Li, Z. Chai, W. Shi, X. Li and H. Ma, *Chemical Communications*, 2020, **56**, 6344-6347.
7. J. M. Meinig, L. Fu and B. R. Peterson, *Angewandte Chemie International Edition*, 2015, **54**, 9696-9699.
8. K. E. Knewton, D. Rane and B. R. Peterson, *ACS Chemical Biology*, 2018, **13**, 2595-2602.
9. M. Albrecht, M. Müller, O. Mergel, K. Rissanen and A. Valkonen, *Chemistry – A European Journal*, 2010, **16**, 5062-5069.
